# Supplementary material for: Probiotic supplementation restores normal microbiota composition and function in antibiotic-treated and in caesarean-born infants
Source: Microbiome. 2018 Oct 16;6:182. doi: 10.1186/s40168-018-0567-4 (PMC6192119; doi:10.1186/s40168-018-0567-4)
Supplement: Supplementary file 1 — Model results. (XLSX 153 kb) [file 40168_2018_567_MOESM1_ESM.xlsx]

## Sheet: suppltable1_probiotic_breastfed
taxon	Fold change	p	FDR	model
Actinobacteria	1.19659	0.000141392	0.000427389	log nlme::gls
Actinobacteria_Actinobacteria	1.24769	0.611898	0.689681	log lm
Actinobacteria_Actinobacteria_Actinomycetales	0.635354	0.0231805	0.0376337	MASS::glm.nb
Actinobacteria_Actinobacteria_Actinomycetales_Actinomycetaceae	0.635354	0.0231805	0.0376337	MASS::glm.nb
Actinobacteria_Actinobacteria_Actinomycetales_Actinomycetaceae_Actinomyces	0.635354	0.0231805	0.0376337	MASS::glm.nb
Actinobacteria_Actinobacteria_Bifidobacteriales	1.28916	1.80593e-05	7.27846e-05	log nlme::gls
Actinobacteria_Actinobacteria_Bifidobacteriales_Bifidobacteriaceae	1.28916	1.80593e-05	7.27846e-05	log nlme::gls
Actinobacteria_Actinobacteria_Bifidobacteriales_Bifidobacteriaceae_Bifidobacterium	1.28924	1.80219e-05	7.27846e-05	log nlme::gls
Actinobacteria_Actinobacteria_Bifidobacteriales_Bifidobacteriaceae_Gardnerella	0.171329	9.91003e-06	4.39344e-05	MASS::glm.nb
Actinobacteria_Actinobacteria_Corynebacteriales	0.176489	2.15593e-14	9.55794e-13	MASS::glm.nb
Actinobacteria_Actinobacteria_Corynebacteriales_Corynebacteriaceae	0.721956	0.147455	0.190403	MASS::glm.nb
Actinobacteria_Actinobacteria_Corynebacteriales_Corynebacteriaceae_Corynebacterium	0.721956	0.147455	0.190403	MASS::glm.nb
Actinobacteria_Actinobacteria_Corynebacteriales_Nocardiaceae	0.168407	7.48486e-10	9.95486e-09	MASS::glm.nb
Actinobacteria_Actinobacteria_Corynebacteriales_Nocardiaceae_Rhodococcus	0.168407	7.48486e-10	9.95486e-09	MASS::glm.nb
Actinobacteria_Actinobacteria_Micrococcales	0.621862	0.0156721	0.0270701	MASS::glm.nb
Actinobacteria_Actinobacteria_Micrococcales_Micrococcaceae	0.621862	0.0156721	0.0270701	MASS::glm.nb
Actinobacteria_Actinobacteria_Micrococcales_Micrococcaceae_Rothia	0.587344	0.0095973	0.017978	MASS::glm.nb
Actinobacteria_Coriobacteriia	0.361355	2.21239e-05	8.17354e-05	MASS::glm.nb
Actinobacteria_Coriobacteriia_Coriobacteriales	0.361355	2.21239e-05	8.17354e-05	MASS::glm.nb
Actinobacteria_Coriobacteriia_Coriobacteriales_Coriobacteriaceae	0.361355	2.21239e-05	8.17354e-05	MASS::glm.nb
Actinobacteria_Coriobacteriia_Coriobacteriales_Coriobacteriaceae_Atopobium	0.57216	0.0023288	0.00553089	log nlme::gls
Actinobacteria_Coriobacteriia_Coriobacteriales_Coriobacteriaceae_Collinsella	0.326099	0.013345	0.0239849	MASS::glm.nb
Actinobacteria_Coriobacteriia_Coriobacteriales_Coriobacteriaceae_Eggerthella	0.648908	0.103416	0.138933	log nlme::gls
Actinobacteria_Coriobacteriia_Coriobacteriales_Coriobacteriaceae_uncultured	0.447153	0.165037	0.207075	MASS::glm.nb
Bacteroidetes	0.913207	0.71147	0.782029	MASS::glm.nb
Bacteroidetes_Bacteroidia	0.913207	0.71147	0.782029	MASS::glm.nb
Bacteroidetes_Bacteroidia_Bacteroidales	0.913207	0.71147	0.782029	MASS::glm.nb
Bacteroidetes_Bacteroidia_Bacteroidales_Bacteroidaceae	0.925451	0.766284	0.815326	MASS::glm.nb
Bacteroidetes_Bacteroidia_Bacteroidales_Bacteroidaceae_Bacteroides	0.925451	0.766284	0.815326	MASS::glm.nb
Bacteroidetes_Bacteroidia_Bacteroidales_Porphyromonadaceae	0.426181	0.0166522	0.0283942	MASS::glm.nb
Bacteroidetes_Bacteroidia_Bacteroidales_Porphyromonadaceae_Dysgonomonas	0.240308	0.014676	0.0260254	MASS::glm.nb
Bacteroidetes_Bacteroidia_Bacteroidales_Porphyromonadaceae_Parabacteroides	0.454228	0.0597545	0.0883039	MASS::glm.nb
Bacteroidetes_Bacteroidia_Bacteroidales_Prevotellaceae	0.67407	0.26808	0.324133	MASS::glm.nb
Bacteroidetes_Bacteroidia_Bacteroidales_Prevotellaceae_Prevotella	0.685031	0.295682	0.354286	MASS::glm.nb
Bacteroidetes_Bacteroidia_Bacteroidales_Rikenellaceae	0.525319	0.206061	0.25376	MASS::glm.nb
Bacteroidetes_Bacteroidia_Bacteroidales_Rikenellaceae_Alistipes	0.525319	0.206061	0.25376	MASS::glm.nb
Firmicutes	0.598717	0.00258206	0.00592094	log nlme::gls
Firmicutes_Bacilli	1.06474	0.00252376	0.00588877	log nlme::gls
Firmicutes_Bacilli_Bacillales	0.623786	0.0121353	0.0224166	log nlme::gls
Firmicutes_Bacilli_Bacillales_Bacillaceae	0.62121	0.00505823	0.010505	log nlme::gls
Firmicutes_Bacilli_Bacillales_Bacillaceae_Bacillus	0.62121	0.00505823	0.010505	log nlme::gls
Firmicutes_Bacilli_Bacillales_FamilyXIIncertaeSedis	0.939401	0.740972	0.801214	MASS::glm.nb
Firmicutes_Bacilli_Bacillales_FamilyXIIncertaeSedis_Gemella	0.939401	0.740972	0.801214	MASS::glm.nb
Firmicutes_Bacilli_Bacillales_Staphylococcaceae	0.549095	0.00271604	0.00602055	MASS::glm.nb
Firmicutes_Bacilli_Bacillales_Staphylococcaceae_Staphylococcus	0.549095	0.00271604	0.00602055	MASS::glm.nb
Firmicutes_Bacilli_Lactobacillales	1.08338	0.00142101	0.00377988	log nlme::gls
Firmicutes_Bacilli_Lactobacillales_Carnobacteriaceae	1.43451	0.35568	0.418632	MASS::glm.nb
Firmicutes_Bacilli_Lactobacillales_Carnobacteriaceae_Granulicatella	1.43451	0.35568	0.418632	MASS::glm.nb
Firmicutes_Bacilli_Lactobacillales_Enterococcaceae	0.406733	0.000130719	0.000413942	MASS::glm.nb
Firmicutes_Bacilli_Lactobacillales_Enterococcaceae_Enterococcus	0.406733	0.000130719	0.000413942	MASS::glm.nb
Firmicutes_Bacilli_Lactobacillales_Lactobacillaceae	2.12238	3.21548e-19	2.13829e-17	log nlme::gls
Firmicutes_Bacilli_Lactobacillales_Lactobacillaceae_Lactobacillus	2.11589	3.14246e-19	2.13829e-17	log nlme::gls
Firmicutes_Bacilli_Lactobacillales_Streptococcaceae	0.66671	0.00520301	0.010505	MASS::glm.nb
Firmicutes_Bacilli_Lactobacillales_Streptococcaceae_Streptococcus	0.666744	0.00521302	0.010505	MASS::glm.nb
Firmicutes_Clostridia	0.337687	1.30381e-10	2.16758e-09	log nlme::gls
Firmicutes_Clostridia_Clostridiales	0.337687	1.30381e-10	2.16758e-09	log nlme::gls
Firmicutes_Clostridia_Clostridiales_Christensenellaceae	0.511636	0.00133257	0.00361697	log nlme::gls
Firmicutes_Clostridia_Clostridiales_Christensenellaceae_uncultured	0.511636	0.00133257	0.00361697	log nlme::gls
Firmicutes_Clostridia_Clostridiales_Clostridiaceae	0.248922	1.39143e-07	1.02811e-06	MASS::glm.nb
Firmicutes_Clostridia_Clostridiales_Clostridiaceae_Clostridium	0.248922	1.39143e-07	1.02811e-06	MASS::glm.nb
Firmicutes_Clostridia_Clostridiales_FamilyXIIncertaeSedis	0.543749	0.0387879	0.059986	MASS::glm.nb
Firmicutes_Clostridia_Clostridiales_FamilyXIIncertaeSedis_Anaerococcus	0.897847	0.809115	0.854066	MASS::glm.nb
Firmicutes_Clostridia_Clostridiales_FamilyXIIncertaeSedis_Finegoldia	0.445707	0.00579516	0.0110108	MASS::glm.nb
Firmicutes_Clostridia_Clostridiales_FamilyXIIncertaeSedis_Peptoniphilus	0.560692	0.162362	0.207075	MASS::glm.nb
Firmicutes_Clostridia_Clostridiales_Lachnospiraceae	0.316544	1.85766e-09	2.0589e-08	log nlme::gls
Firmicutes_Clostridia_Clostridiales_Lachnospiraceae_Anaerostipes	0.227796	2.80042e-06	1.61937e-05	MASS::glm.nb
Firmicutes_Clostridia_Clostridiales_Lachnospiraceae_Blautia	0.454135	2.25452e-06	1.36296e-05	log nlme::gls
Firmicutes_Clostridia_Clostridiales_Lachnospiraceae_Coprococcus	0.584427	0.00013535	0.000418642	log nlme::gls
Firmicutes_Clostridia_Clostridiales_Lachnospiraceae_Dorea	0.48635	0.0363307	0.0568468	MASS::glm.nb
Firmicutes_Clostridia_Clostridiales_Lachnospiraceae_IncertaeSedis	0.224901	8.40237e-10	1.01592e-08	log nlme::gls
Firmicutes_Clostridia_Clostridiales_Lachnospiraceae_Pseudobutyrivibrio	0.818574	0.371716	0.433669	MASS::glm.nb
Firmicutes_Clostridia_Clostridiales_Lachnospiraceae_Roseburia	0.586054	7.26717e-07	4.60254e-06	log nlme::gls
Firmicutes_Clostridia_Clostridiales_Peptostreptococcaceae	0.570792	0.00172462	0.00424768	log nlme::gls
Firmicutes_Clostridia_Clostridiales_Peptostreptococcaceae_IncertaeSedis	0.566401	0.00200278	0.00484309	log nlme::gls
Firmicutes_Clostridia_Clostridiales_Peptostreptococcaceae_Peptostreptococcus	0.969124	0.967595	0.967595	MASS::glm.nb
Firmicutes_Clostridia_Clostridiales_Ruminococcaceae	0.686792	4.31112e-08	4.09556e-07	log nlme::gls
Firmicutes_Clostridia_Clostridiales_Ruminococcaceae_Faecalibacterium	0.845489	1.25352e-07	1.02811e-06	log nlme::gls
Firmicutes_Clostridia_Clostridiales_Ruminococcaceae_Flavonifractor	0.478546	0.164034	0.207075	MASS::glm.nb
Firmicutes_Clostridia_Clostridiales_Ruminococcaceae_IncertaeSedis	0.246804	2.63757e-08	2.69844e-07	MASS::glm.nb
Firmicutes_Clostridia_Clostridiales_Ruminococcaceae_Ruminococcus	0.454121	2.28142e-05	8.20076e-05	log nlme::gls
Firmicutes_Clostridia_Clostridiales_Ruminococcaceae_Subdoligranulum	0.817749	0.00330421	0.00720427	log nlme::gls
Firmicutes_Erysipelotrichia	0.212316	8.46881e-06	3.88397e-05	log nlme::gls
Firmicutes_Erysipelotrichia_Erysipelotrichales	0.212316	8.46881e-06	3.88397e-05	log nlme::gls
Firmicutes_Erysipelotrichia_Erysipelotrichales_Erysipelotrichaceae	0.212316	8.46881e-06	3.88397e-05	log nlme::gls
Firmicutes_Erysipelotrichia_Erysipelotrichales_Erysipelotrichaceae_IncertaeSedis	0.20818	0.000205174	0.000593221	MASS::glm.nb
Firmicutes_Erysipelotrichia_Erysipelotrichales_Erysipelotrichaceae_uncultured	0.230958	0.000148718	0.000439545	log nlme::gls
Firmicutes_Negativicutes	0.684778	0.059618	0.0883039	MASS::glm.nb
Firmicutes_Negativicutes_Selenomonadales	0.684778	0.059618	0.0883039	MASS::glm.nb
Firmicutes_Negativicutes_Selenomonadales_Acidaminococcaceae	0.694842	0.510636	0.58547	MASS::glm.nb
Firmicutes_Negativicutes_Selenomonadales_Acidaminococcaceae_Phascolarctobacterium	0.698827	0.527914	0.600108	MASS::glm.nb
Firmicutes_Negativicutes_Selenomonadales_Veillonellaceae	0.694883	0.073607	0.10641	MASS::glm.nb
Firmicutes_Negativicutes_Selenomonadales_Veillonellaceae_Dialister	1.68033	0.135648	0.178626	MASS::glm.nb
Firmicutes_Negativicutes_Selenomonadales_Veillonellaceae_Megasphaera	0.0643369	3.78173e-06	2.09571e-05	MASS::glm.nb
Firmicutes_Negativicutes_Selenomonadales_Veillonellaceae_Veillonella	0.715451	0.109453	0.145572	MASS::glm.nb
Proteobacteria	0.416594	3.37981e-07	2.36586e-06	MASS::glm.nb
Proteobacteria_Betaproteobacteria	0.883426	0.0414647	0.0633885	log nlme::gls
Proteobacteria_Betaproteobacteria_Burkholderiales	0.999548	0.0720396	0.105289	log nlme::gls
Proteobacteria_Betaproteobacteria_Burkholderiales_Alcaligenaceae	0.974843	0.0232027	0.0376337	log nlme::gls
Proteobacteria_Betaproteobacteria_Burkholderiales_Alcaligenaceae_Bordetella	0.603119	0.00382888	0.00821356	log nlme::gls
Proteobacteria_Betaproteobacteria_Burkholderiales_Burkholderiaceae	1.73263	0.246992	0.301375	log nlme::gls
Proteobacteria_Betaproteobacteria_Burkholderiales_Burkholderiaceae_Burkholderia	1.78038	0.102822	0.138933	MASS::glm.nb
Proteobacteria_Betaproteobacteria_Burkholderiales_Oxalobacteraceae	0.368168	0.0941816	0.129136	log nlme::gls
Proteobacteria_Betaproteobacteria_Burkholderiales_Oxalobacteraceae_Oxalobacter	0.368168	0.0941816	0.129136	log nlme::gls
Proteobacteria_Betaproteobacteria_Neisseriales	0.431479	0.0773505	0.108291	MASS::glm.nb
Proteobacteria_Betaproteobacteria_Neisseriales_Neisseriaceae	0.431479	0.0773505	0.108291	MASS::glm.nb
Proteobacteria_Betaproteobacteria_Neisseriales_Neisseriaceae_Neisseria	0.431479	0.0773505	0.108291	MASS::glm.nb
Proteobacteria_Deltaproteobacteria	0.301181	6.57624e-05	0.00021866	MASS::glm.nb
Proteobacteria_Deltaproteobacteria_Desulfovibrionales	0.301181	6.57624e-05	0.00021866	MASS::glm.nb
Proteobacteria_Deltaproteobacteria_Desulfovibrionales_Desulfovibrionaceae	0.301181	6.57624e-05	0.00021866	MASS::glm.nb
Proteobacteria_Deltaproteobacteria_Desulfovibrionales_Desulfovibrionaceae_Bilophila	0.258619	0.0129264	0.0235508	MASS::glm.nb
Proteobacteria_Deltaproteobacteria_Desulfovibrionales_Desulfovibrionaceae_Desulfovibrio	0.425243	0.0242616	0.0388771	MASS::glm.nb
Proteobacteria_Gammaproteobacteria	0.414902	5.37567e-07	3.57482e-06	MASS::glm.nb
Proteobacteria_Gammaproteobacteria_Aeromonadales	0.272562	0.00556475	0.0107263	log nlme::gls
Proteobacteria_Gammaproteobacteria_Aeromonadales_Aeromonadaceae	0.272562	0.00556475	0.0107263	log nlme::gls
Proteobacteria_Gammaproteobacteria_Aeromonadales_Aeromonadaceae_Aeromonas	0.272562	0.00556475	0.0107263	log nlme::gls
Proteobacteria_Gammaproteobacteria_Enterobacteriales	0.42227	5.96662e-06	3.05215e-05	MASS::glm.nb
Proteobacteria_Gammaproteobacteria_Enterobacteriales_Enterobacteriaceae	0.42227	5.96662e-06	3.05215e-05	MASS::glm.nb
Proteobacteria_Gammaproteobacteria_Enterobacteriales_Enterobacteriaceae_Citrobacter	0.655227	0.492466	0.569548	MASS::glm.nb
Proteobacteria_Gammaproteobacteria_Enterobacteriales_Enterobacteriaceae_Enterobacter	0.402374	0.000340088	0.000962375	MASS::glm.nb
Proteobacteria_Gammaproteobacteria_Enterobacteriales_Enterobacteriaceae_Escherichia.Shigella	0.541597	0.0292725	0.0463481	MASS::glm.nb
Proteobacteria_Gammaproteobacteria_Enterobacteriales_Enterobacteriaceae_Klebsiella	0.142233	8.01442e-08	7.10612e-07	MASS::glm.nb
Proteobacteria_Gammaproteobacteria_Enterobacteriales_Enterobacteriaceae_Salmonella	1.1009	0.903731	0.914472	MASS::glm.nb
Proteobacteria_Gammaproteobacteria_Pasteurellales	0.129027	2.63649e-12	5.84422e-11	MASS::glm.nb
Proteobacteria_Gammaproteobacteria_Pasteurellales_Pasteurellaceae	0.129027	2.63649e-12	5.84422e-11	MASS::glm.nb
Proteobacteria_Gammaproteobacteria_Pasteurellales_Pasteurellaceae_Haemophilus	0.129027	2.63649e-12	5.84422e-11	MASS::glm.nb
Proteobacteria_Gammaproteobacteria_Pseudomonadales	0.551603	0.00157681	0.00395689	log nlme::gls
Proteobacteria_Gammaproteobacteria_Pseudomonadales_Pseudomonadaceae	0.551603	0.00157681	0.00395689	log nlme::gls
Proteobacteria_Gammaproteobacteria_Pseudomonadales_Pseudomonadaceae_Pseudomonas	0.551603	0.00157681	0.00395689	log nlme::gls
Verrucomicrobia	1.07261	0.907596	0.914472	MASS::glm.nb
Verrucomicrobia_Verrucomicrobiae	1.07261	0.907596	0.914472	MASS::glm.nb
Verrucomicrobia_Verrucomicrobiae_Verrucomicrobiales	1.07261	0.907596	0.914472	MASS::glm.nb
Verrucomicrobia_Verrucomicrobiae_Verrucomicrobiales_Verrucomicrobiaceae	1.07261	0.907596	0.914472	MASS::glm.nb
Verrucomicrobia_Verrucomicrobiae_Verrucomicrobiales_Verrucomicrobiaceae_Akkermansia	1.07261	0.907596	0.914472	MASS::glm.nb

## Sheet: suppltable2_probiotic_formula
taxon	Fold change	p	FDR	model
Actinobacteria	0.895553	0	0	MASS::glm.nb
Actinobacteria_Actinobacteria	0.95634	5.65802e-19	1.4824e-17	MASS::glm.nb
Actinobacteria_Actinobacteria_Actinomycetales	0.541324	0.09194	0.401471	MASS::glm.nb
Actinobacteria_Actinobacteria_Actinomycetales_Actinomycetaceae	0.541324	0.09194	0.401471	MASS::glm.nb
Actinobacteria_Actinobacteria_Actinomycetales_Actinomycetaceae_Actinomyces	0.541324	0.09194	0.401471	MASS::glm.nb
Actinobacteria_Actinobacteria_Bifidobacteriales	0.938017	1.00461e-59	3.9419e-58	MASS::glm.nb
Actinobacteria_Actinobacteria_Bifidobacteriales_Bifidobacteriaceae	0.938017	1.00461e-59	3.9419e-58	MASS::glm.nb
Actinobacteria_Actinobacteria_Bifidobacteriales_Bifidobacteriaceae_Bifidobacterium	0.938018	1.20363e-59	3.9419e-58	MASS::glm.nb
Actinobacteria_Actinobacteria_Bifidobacteriales_Bifidobacteriaceae_Gardnerella	0.35145	0.244108	0.561019	MASS::glm.nb
Actinobacteria_Actinobacteria_Corynebacteriales	4.01223	0.653019	0.868684	log nlme::gls
Actinobacteria_Actinobacteria_Corynebacteriales_Corynebacteriaceae	2.01402	0.412398	0.769195	MASS::glm.nb
Actinobacteria_Actinobacteria_Corynebacteriales_Corynebacteriaceae_Corynebacterium	2.01402	0.412398	0.769195	MASS::glm.nb
Actinobacteria_Actinobacteria_Corynebacteriales_Nocardiaceae	4.02573	0.838592	0.890483	log nlme::gls
Actinobacteria_Actinobacteria_Corynebacteriales_Nocardiaceae_Rhodococcus	4.02573	0.838592	0.890483	log nlme::gls
Actinobacteria_Actinobacteria_Micrococcales	1.27522	0.609843	0.868684	MASS::glm.nb
Actinobacteria_Actinobacteria_Micrococcales_Micrococcaceae	1.27522	0.609843	0.868684	MASS::glm.nb
Actinobacteria_Actinobacteria_Micrococcales_Micrococcaceae_Rothia	1.27522	0.609843	0.868684	MASS::glm.nb
Actinobacteria_Coriobacteriia	0.465322	0.208058	0.544458	MASS::glm.nb
Actinobacteria_Coriobacteriia_Coriobacteriales	0.465322	0.208058	0.544458	MASS::glm.nb
Actinobacteria_Coriobacteriia_Coriobacteriales_Coriobacteriaceae	0.465322	0.208058	0.544458	MASS::glm.nb
Actinobacteria_Coriobacteriia_Coriobacteriales_Coriobacteriaceae_Atopobium	0.613583	0.505121	0.816923	MASS::glm.nb
Actinobacteria_Coriobacteriia_Coriobacteriales_Coriobacteriaceae_Collinsella	0.370978	0.152135	0.541783	MASS::glm.nb
Actinobacteria_Coriobacteriia_Coriobacteriales_Coriobacteriaceae_Eggerthella	0.834542	0.790316	0.890483	MASS::glm.nb
Actinobacteria_Coriobacteriia_Coriobacteriales_Coriobacteriaceae_uncultured	2.39277	0.188659	0.544458	MASS::glm.nb
Bacteroidetes	0.796018	0.71488	0.868684	MASS::glm.nb
Bacteroidetes_Bacteroidia	0.796018	0.71488	0.868684	MASS::glm.nb
Bacteroidetes_Bacteroidia_Bacteroidales	0.796018	0.71488	0.868684	MASS::glm.nb
Bacteroidetes_Bacteroidia_Bacteroidales_Bacteroidaceae	0.785195	0.711906	0.868684	MASS::glm.nb
Bacteroidetes_Bacteroidia_Bacteroidales_Bacteroidaceae_Bacteroides	0.785195	0.711906	0.868684	MASS::glm.nb
Bacteroidetes_Bacteroidia_Bacteroidales_Porphyromonadaceae	1.16973	0.903773	0.917785	MASS::glm.nb
Bacteroidetes_Bacteroidia_Bacteroidales_Porphyromonadaceae_Dysgonomonas	4.10676	0.203174	0.544458	MASS::glm.nb
Bacteroidetes_Bacteroidia_Bacteroidales_Porphyromonadaceae_Parabacteroides	0.256112	0.0737827	0.392821	MASS::glm.nb
Bacteroidetes_Bacteroidia_Bacteroidales_Prevotellaceae	0.0337866	0.011643	0.117326	MASS::glm.nb
Bacteroidetes_Bacteroidia_Bacteroidales_Prevotellaceae_Prevotella	0.0337866	0.011643	0.117326	MASS::glm.nb
Bacteroidetes_Bacteroidia_Bacteroidales_Rikenellaceae	0.772387	0.893075	0.914007	MASS::glm.nb
Bacteroidetes_Bacteroidia_Bacteroidales_Rikenellaceae_Alistipes	0.772387	0.893075	0.914007	MASS::glm.nb
Firmicutes	1.22077	0.492524	0.816923	MASS::glm.nb
Firmicutes_Bacilli	1.91278	0.0161187	0.14077	MASS::glm.nb
Firmicutes_Bacilli_Bacillales	0.960042	0.676966	0.868684	log nlme::gls
Firmicutes_Bacilli_Bacillales_Bacillaceae	0.490357	0.216121	0.544458	MASS::glm.nb
Firmicutes_Bacilli_Bacillales_Bacillaceae_Bacillus	0.490357	0.216121	0.544458	MASS::glm.nb
Firmicutes_Bacilli_Bacillales_FamilyXIIncertaeSedis	1.36289	0.71993	0.868684	MASS::glm.nb
Firmicutes_Bacilli_Bacillales_FamilyXIIncertaeSedis_Gemella	1.36289	0.71993	0.868684	MASS::glm.nb
Firmicutes_Bacilli_Bacillales_Staphylococcaceae	1.25163	0.644505	0.868684	log nlme::gls
Firmicutes_Bacilli_Bacillales_Staphylococcaceae_Staphylococcus	1.25163	0.644505	0.868684	log nlme::gls
Firmicutes_Bacilli_Lactobacillales	1.94161	0.0155229	0.14077	MASS::glm.nb
Firmicutes_Bacilli_Lactobacillales_Carnobacteriaceae	1.50681	0.542753	0.840581	MASS::glm.nb
Firmicutes_Bacilli_Lactobacillales_Carnobacteriaceae_Granulicatella	1.50681	0.542753	0.840581	MASS::glm.nb
Firmicutes_Bacilli_Lactobacillales_Enterococcaceae	1.83221	0.240923	0.561019	MASS::glm.nb
Firmicutes_Bacilli_Lactobacillales_Enterococcaceae_Enterococcus	1.83221	0.240923	0.561019	MASS::glm.nb
Firmicutes_Bacilli_Lactobacillales_Lactobacillaceae	4.45892	0.0100199	0.117326	MASS::glm.nb
Firmicutes_Bacilli_Lactobacillales_Lactobacillaceae_Lactobacillus	4.45892	0.0100199	0.117326	MASS::glm.nb
Firmicutes_Bacilli_Lactobacillales_Streptococcaceae	1.90753	0.0704268	0.392821	MASS::glm.nb
Firmicutes_Bacilli_Lactobacillales_Streptococcaceae_Streptococcus	1.89194	0.0749658	0.392821	MASS::glm.nb
Firmicutes_Clostridia	0.712818	0.418038	0.769195	MASS::glm.nb
Firmicutes_Clostridia_Clostridiales	0.712818	0.418038	0.769195	MASS::glm.nb
Firmicutes_Clostridia_Clostridiales_Christensenellaceae	0.611471	0.48636	0.816923	MASS::glm.nb
Firmicutes_Clostridia_Clostridiales_Christensenellaceae_uncultured	0.611471	0.48636	0.816923	MASS::glm.nb
Firmicutes_Clostridia_Clostridiales_Clostridiaceae	0.962173	0.948958	0.948958	MASS::glm.nb
Firmicutes_Clostridia_Clostridiales_Clostridiaceae_Clostridium	0.962173	0.948958	0.948958	MASS::glm.nb
Firmicutes_Clostridia_Clostridiales_FamilyXIIncertaeSedis	0.626363	0.495773	0.816923	MASS::glm.nb
Firmicutes_Clostridia_Clostridiales_FamilyXIIncertaeSedis_Anaerococcus	1.30822	0.803058	0.890483	MASS::glm.nb
Firmicutes_Clostridia_Clostridiales_FamilyXIIncertaeSedis_Finegoldia	0.686896	0.645821	0.868684	MASS::glm.nb
Firmicutes_Clostridia_Clostridiales_FamilyXIIncertaeSedis_Peptoniphilus	0.488458	0.373702	0.765692	MASS::glm.nb
Firmicutes_Clostridia_Clostridiales_Lachnospiraceae	0.614614	0.386362	0.769195	MASS::glm.nb
Firmicutes_Clostridia_Clostridiales_Lachnospiraceae_Anaerostipes	3.50159	0.0464054	0.351978	MASS::glm.nb
Firmicutes_Clostridia_Clostridiales_Lachnospiraceae_Blautia	0.1796	0.0273818	0.224188	MASS::glm.nb
Firmicutes_Clostridia_Clostridiales_Lachnospiraceae_Coprococcus	1.21654	0.813502	0.890483	MASS::glm.nb
Firmicutes_Clostridia_Clostridiales_Lachnospiraceae_Dorea	0.618644	0.651406	0.868684	MASS::glm.nb
Firmicutes_Clostridia_Clostridiales_Lachnospiraceae_IncertaeSedis	1.01582	0.133424	0.514075	log nlme::gls
Firmicutes_Clostridia_Clostridiales_Lachnospiraceae_Pseudobutyrivibrio	0.828859	0.638891	0.868684	MASS::glm.nb
Firmicutes_Clostridia_Clostridiales_Lachnospiraceae_Roseburia	2.02057	0.422764	0.769195	MASS::glm.nb
Firmicutes_Clostridia_Clostridiales_Peptostreptococcaceae	1.84151	0.117751	0.482044	MASS::glm.nb
Firmicutes_Clostridia_Clostridiales_Peptostreptococcaceae_IncertaeSedis	1.84378	0.125155	0.496829	MASS::glm.nb
Firmicutes_Clostridia_Clostridiales_Peptostreptococcaceae_Peptostreptococcus	1.1625	NA	NA	NA
Firmicutes_Clostridia_Clostridiales_Ruminococcaceae	0.845391	0.82304	0.890483	MASS::glm.nb
Firmicutes_Clostridia_Clostridiales_Ruminococcaceae_Faecalibacterium	1.34963	0.751789	0.887246	MASS::glm.nb
Firmicutes_Clostridia_Clostridiales_Ruminococcaceae_Flavonifractor	3.96473	0.0955769	0.40389	MASS::glm.nb
Firmicutes_Clostridia_Clostridiales_Ruminococcaceae_IncertaeSedis	0.421967	0.192345	0.544458	MASS::glm.nb
Firmicutes_Clostridia_Clostridiales_Ruminococcaceae_Ruminococcus	0.541428	0.41182	0.769195	MASS::glm.nb
Firmicutes_Clostridia_Clostridiales_Ruminococcaceae_Subdoligranulum	0.803939	0.849698	0.890483	MASS::glm.nb
Firmicutes_Erysipelotrichia	0.664009	0.551832	0.840581	MASS::glm.nb
Firmicutes_Erysipelotrichia_Erysipelotrichales	0.664009	0.551832	0.840581	MASS::glm.nb
Firmicutes_Erysipelotrichia_Erysipelotrichales_Erysipelotrichaceae	0.664009	0.551832	0.840581	MASS::glm.nb
Firmicutes_Erysipelotrichia_Erysipelotrichales_Erysipelotrichaceae_IncertaeSedis	0.415659	0.143984	0.538911	MASS::glm.nb
Firmicutes_Erysipelotrichia_Erysipelotrichales_Erysipelotrichaceae_uncultured	0.809209	0.806351	0.890483	MASS::glm.nb
Firmicutes_Negativicutes	6.76143	0.000345098	0.00644878	MASS::glm.nb
Firmicutes_Negativicutes_Selenomonadales	6.76143	0.000345098	0.00644878	MASS::glm.nb
Firmicutes_Negativicutes_Selenomonadales_Acidaminococcaceae	0.471198	0.8917	0.914007	log nlme::gls
Firmicutes_Negativicutes_Selenomonadales_Acidaminococcaceae_Phascolarctobacterium	0.414676	0.256109	0.561354	MASS::glm.nb
Firmicutes_Negativicutes_Selenomonadales_Veillonellaceae	6.93382	0.000393819	0.00644878	MASS::glm.nb
Firmicutes_Negativicutes_Selenomonadales_Veillonellaceae_Dialister	1.25013	0.79628	0.890483	MASS::glm.nb
Firmicutes_Negativicutes_Selenomonadales_Veillonellaceae_Megasphaera	5.43157	0.239269	0.561019	MASS::glm.nb
Firmicutes_Negativicutes_Selenomonadales_Veillonellaceae_Veillonella	6.93164	0.000603022	0.00877733	MASS::glm.nb
Proteobacteria	1.6823	0.271108	0.582215	MASS::glm.nb
Proteobacteria_Betaproteobacteria	1.50061	0.374079	0.765692	log nlme::gls
Proteobacteria_Betaproteobacteria_Burkholderiales	1.78842	0.420677	0.769195	log nlme::gls
Proteobacteria_Betaproteobacteria_Burkholderiales_Alcaligenaceae	1.43635	0.72943	0.868684	log nlme::gls
Proteobacteria_Betaproteobacteria_Burkholderiales_Alcaligenaceae_Bordetella	1.85967	0.451573	0.799406	log nlme::gls
Proteobacteria_Betaproteobacteria_Burkholderiales_Burkholderiaceae	1.4697	0.0533383	0.367753	log nlme::gls
Proteobacteria_Betaproteobacteria_Burkholderiales_Burkholderiaceae_Burkholderia	0.72502	0.0882147	0.401471	log nlme::gls
Proteobacteria_Betaproteobacteria_Burkholderiales_Oxalobacteraceae	6.14667	0.257109	0.561354	MASS::glm.nb
Proteobacteria_Betaproteobacteria_Burkholderiales_Oxalobacteraceae_Oxalobacter	6.14667	0.257109	0.561354	MASS::glm.nb
Proteobacteria_Betaproteobacteria_Neisseriales	0.134186	0.183573	0.544458	MASS::glm.nb
Proteobacteria_Betaproteobacteria_Neisseriales_Neisseriaceae	0.134186	0.183573	0.544458	MASS::glm.nb
Proteobacteria_Betaproteobacteria_Neisseriales_Neisseriaceae_Neisseria	0.134186	0.183573	0.544458	MASS::glm.nb
Proteobacteria_Deltaproteobacteria	5.44561	0.0636935	0.379266	MASS::glm.nb
Proteobacteria_Deltaproteobacteria_Desulfovibrionales	5.44561	0.0636935	0.379266	MASS::glm.nb
Proteobacteria_Deltaproteobacteria_Desulfovibrionales_Desulfovibrionaceae	5.44561	0.0636935	0.379266	MASS::glm.nb
Proteobacteria_Deltaproteobacteria_Desulfovibrionales_Desulfovibrionaceae_Bilophila	3.63261	0.500193	0.816923	MASS::glm.nb
Proteobacteria_Deltaproteobacteria_Desulfovibrionales_Desulfovibrionaceae_Desulfovibrio	6.88739	0.0891034	0.401471	MASS::glm.nb
Proteobacteria_Gammaproteobacteria	1.68992	0.275977	0.583114	MASS::glm.nb
Proteobacteria_Gammaproteobacteria_Aeromonadales	0.837665	0.726196	0.868684	MASS::glm.nb
Proteobacteria_Gammaproteobacteria_Aeromonadales_Aeromonadaceae	0.837665	0.726196	0.868684	MASS::glm.nb
Proteobacteria_Gammaproteobacteria_Aeromonadales_Aeromonadaceae_Aeromonas	0.837665	0.726196	0.868684	MASS::glm.nb
Proteobacteria_Gammaproteobacteria_Enterobacteriales	1.94117	0.19495	0.544458	MASS::glm.nb
Proteobacteria_Gammaproteobacteria_Enterobacteriales_Enterobacteriaceae	1.94117	0.19495	0.544458	MASS::glm.nb
Proteobacteria_Gammaproteobacteria_Enterobacteriales_Enterobacteriaceae_Citrobacter	0.343976	0.4299	0.771464	MASS::glm.nb
Proteobacteria_Gammaproteobacteria_Enterobacteriales_Enterobacteriaceae_Enterobacter	2.22215	0.237395	0.561019	MASS::glm.nb
Proteobacteria_Gammaproteobacteria_Enterobacteriales_Enterobacteriaceae_Escherichia.Shigella	1.58713	0.45817	0.80027	MASS::glm.nb
Proteobacteria_Gammaproteobacteria_Enterobacteriales_Enterobacteriaceae_Klebsiella	5.78148	0.0483634	0.351978	MASS::glm.nb
Proteobacteria_Gammaproteobacteria_Enterobacteriales_Enterobacteriaceae_Salmonella	Inf	NA	NA	NA
Proteobacteria_Gammaproteobacteria_Pasteurellales	2.44213	0.161294	0.541783	MASS::glm.nb
Proteobacteria_Gammaproteobacteria_Pasteurellales_Pasteurellaceae	2.44213	0.161294	0.541783	MASS::glm.nb
Proteobacteria_Gammaproteobacteria_Pasteurellales_Pasteurellaceae_Haemophilus	2.44213	0.161294	0.541783	MASS::glm.nb
Proteobacteria_Gammaproteobacteria_Pseudomonadales	0.64228	0.659894	0.868684	log nlme::gls
Proteobacteria_Gammaproteobacteria_Pseudomonadales_Pseudomonadaceae	0.64228	0.659894	0.868684	log nlme::gls
Proteobacteria_Gammaproteobacteria_Pseudomonadales_Pseudomonadaceae_Pseudomonas	0.64228	0.659894	0.868684	log nlme::gls
Verrucomicrobia	0.769629	0.846173	0.890483	MASS::glm.nb
Verrucomicrobia_Verrucomicrobiae	0.769629	0.846173	0.890483	MASS::glm.nb
Verrucomicrobia_Verrucomicrobiae_Verrucomicrobiales	0.769629	0.846173	0.890483	MASS::glm.nb
Verrucomicrobia_Verrucomicrobiae_Verrucomicrobiales_Verrucomicrobiaceae	0.769629	0.846173	0.890483	MASS::glm.nb
Verrucomicrobia_Verrucomicrobiae_Verrucomicrobiales_Verrucomicrobiaceae_Akkermansia	0.769629	0.846173	0.890483	MASS::glm.nb

## Sheet: suppltable3_birth
taxon	ControlSection_estimate_FoldChange	ControlSection_p	ControlSection_p_FDR	ProbioticSection_estimate_FoldChange	ProbioticSection_p	ProbioticSection_p_FDR	ProbioticVaginal_estimate_FoldChange	ProbioticVaginal_p	ProbioticVaginal_p_FDR	model
Actinobacteria	0.508962	0.299734	0.498026	1.93185	7.44783e-06	7.07544e-05	1.89566	1.37466e-07	9.5879e-07	log nlme::gls
Actinobacteria_Actinobacteria	0.495675	0.217521	0.387135	2.06175	6.81879e-06	6.97614e-05	1.9893	8.8693e-08	6.93892e-07	log nlme::gls
Actinobacteria_Actinobacteria_Actinomycetales	1.39473	0.22122	0.387135	1.43398	0.230214	0.425256	0.758207	0.1157	0.153882	MASS::glm.nb
Actinobacteria_Actinobacteria_Actinomycetales_Actinomycetaceae	1.39473	0.22122	0.387135	1.43398	0.230214	0.425256	0.758207	0.1157	0.153882	MASS::glm.nb
Actinobacteria_Actinobacteria_Actinomycetales_Actinomycetaceae_Actinomyces	1.39473	0.22122	0.387135	1.43398	0.230214	0.425256	0.758207	0.1157	0.153882	MASS::glm.nb
Actinobacteria_Actinobacteria_Bifidobacteriales	0.24969	0.0101978	0.0437721	3.41118	9.83852e-09	2.61705e-07	3.07201	5.67318e-07	2.71637e-06	log nlme::gls
Actinobacteria_Actinobacteria_Bifidobacteriales_Bifidobacteriaceae	0.24969	0.0101978	0.0437721	3.41118	9.83852e-09	2.61705e-07	3.07201	5.67318e-07	2.71637e-06	log nlme::gls
Actinobacteria_Actinobacteria_Bifidobacteriales_Bifidobacteriaceae_Bifidobacterium	0.249713	0.0102025	0.0437721	3.41151	9.81239e-09	2.61705e-07	3.07229	5.66133e-07	2.71637e-06	log nlme::gls
Actinobacteria_Actinobacteria_Bifidobacteriales_Bifidobacteriaceae_Gardnerella	0.253089	0.0184025	0.0679869	0.0699565	0.000882101	0.00469277	0.215596	3.63409e-05	0.000130631	MASS::glm.nb
Actinobacteria_Actinobacteria_Corynebacteriales	0.927708	0.83839	0.871139	0.664515	0.31379	0.521676	0.210291	6.06615e-11	8.96442e-10	MASS::glm.nb
Actinobacteria_Actinobacteria_Corynebacteriales_Corynebacteriaceae	1.27069	0.423391	0.592747	0.291397	0.00110777	0.00526189	0.886871	0.542841	0.601649	MASS::glm.nb
Actinobacteria_Actinobacteria_Corynebacteriales_Corynebacteriaceae_Corynebacterium	1.27069	0.423391	0.592747	0.291397	0.00110777	0.00526189	0.886871	0.542841	0.601649	MASS::glm.nb
Actinobacteria_Actinobacteria_Corynebacteriales_Nocardiaceae	0.905938	0.825442	0.864439	0.674007	0.424329	0.598482	0.201583	3.33662e-08	2.77357e-07	MASS::glm.nb
Actinobacteria_Actinobacteria_Corynebacteriales_Nocardiaceae_Rhodococcus	0.905938	0.825442	0.864439	0.674007	0.424329	0.598482	0.201583	3.33662e-08	2.77357e-07	MASS::glm.nb
Actinobacteria_Actinobacteria_Micrococcales	0.842146	0.50889	0.650792	0.824137	0.502023	0.674435	0.612924	0.00371346	0.00748318	MASS::glm.nb
Actinobacteria_Actinobacteria_Micrococcales_Micrococcaceae	0.842146	0.50889	0.650792	0.824137	0.502023	0.674435	0.612924	0.00371346	0.00748318	MASS::glm.nb
Actinobacteria_Actinobacteria_Micrococcales_Micrococcaceae_Rothia	0.728203	0.247198	0.421505	0.747269	0.337136	0.531578	0.582924	0.00238209	0.00519373	MASS::glm.nb
Actinobacteria_Coriobacteriia	0.18459	3.43048e-07	3.50965e-06	0.374946	0.00722804	0.0267036	0.415585	4.10538e-05	0.000136504	MASS::glm.nb
Actinobacteria_Coriobacteriia_Coriobacteriales	0.18459	3.43048e-07	3.50965e-06	0.374946	0.00722804	0.0267036	0.415585	4.10538e-05	0.000136504	MASS::glm.nb
Actinobacteria_Coriobacteriia_Coriobacteriales_Coriobacteriaceae	0.18459	3.43048e-07	3.50965e-06	0.374946	0.00722804	0.0267036	0.415585	4.10538e-05	0.000136504	MASS::glm.nb
Actinobacteria_Coriobacteriia_Coriobacteriales_Coriobacteriaceae_Atopobium	0.875369	0.558665	0.687985	0.983954	0.950402	0.973485	0.691367	0.0104605	0.0190581	log nlme::gls
Actinobacteria_Coriobacteriia_Coriobacteriales_Coriobacteriaceae_Collinsella	0.00456384	6.45134e-19	2.86009e-17	0.211927	0.0175819	0.0599587	0.302475	0.00179948	0.00412639	MASS::glm.nb
Actinobacteria_Coriobacteriia_Coriobacteriales_Coriobacteriaceae_Eggerthella	0.375979	0.0182588	0.0679869	1.29222	0.577332	0.731287	0.589099	0.0490505	0.0758571	log nlme::gls
Actinobacteria_Coriobacteriia_Coriobacteriales_Coriobacteriaceae_uncultured	0.0200468	6.9567e-07	6.60886e-06	0.0219448	1.05063e-05	9.31561e-05	0.534845	0.182606	0.231301	MASS::glm.nb
Bacteroidetes	0.0913246	1.22227e-11	2.03202e-10	0.117521	3.90633e-08	6.49427e-07	0.83127	0.416848	0.495007	MASS::glm.nb
Bacteroidetes_Bacteroidia	0.0913246	1.22227e-11	2.03202e-10	0.117521	3.90633e-08	6.49427e-07	0.83127	0.416848	0.495007	MASS::glm.nb
Bacteroidetes_Bacteroidia_Bacteroidales	0.0913246	1.22227e-11	2.03202e-10	0.117521	3.90633e-08	6.49427e-07	0.83127	0.416848	0.495007	MASS::glm.nb
Bacteroidetes_Bacteroidia_Bacteroidales_Bacteroidaceae	0.0345629	2.7609e-19	1.836e-17	0.131556	9.49469e-07	1.14799e-05	0.887839	0.622812	0.673447	MASS::glm.nb
Bacteroidetes_Bacteroidia_Bacteroidales_Bacteroidaceae_Bacteroides	0.0345629	2.7609e-19	1.836e-17	0.131556	9.49469e-07	1.14799e-05	0.887839	0.622812	0.673447	MASS::glm.nb
Bacteroidetes_Bacteroidia_Bacteroidales_Porphyromonadaceae	0.0175271	3.46431e-16	1.15188e-14	0.0575315	9.33219e-08	1.37909e-06	0.355607	0.000775872	0.001947	MASS::glm.nb
Bacteroidetes_Bacteroidia_Bacteroidales_Porphyromonadaceae_Dysgonomonas	0.505474	0.357915	0.560032	0.705413	0.66513	0.789841	0.40245	0.0568329	0.0853068	MASS::glm.nb
Bacteroidetes_Bacteroidia_Bacteroidales_Porphyromonadaceae_Parabacteroides	0.0076411	1.59768e-15	4.24983e-14	0.0509239	3.34093e-06	3.70286e-05	0.322799	0.0021404	0.00474456	MASS::glm.nb
Bacteroidetes_Bacteroidia_Bacteroidales_Prevotellaceae	0.602273	0.303309	0.498026	1.55564	0.397015	0.584563	0.523852	0.0420061	0.067311	MASS::glm.nb
Bacteroidetes_Bacteroidia_Bacteroidales_Prevotellaceae_Prevotella	0.610491	0.320124	0.512969	1.57497	0.387926	0.579955	0.530872	0.0481778	0.075384	MASS::glm.nb
Bacteroidetes_Bacteroidia_Bacteroidales_Rikenellaceae	1.34751	0.639797	0.74643	0.0412476	8.05717e-05	0.000564002	0.491844	0.0869816	0.12307	MASS::glm.nb
Bacteroidetes_Bacteroidia_Bacteroidales_Rikenellaceae_Alistipes	1.34751	0.639797	0.74643	0.0412476	8.05717e-05	0.000564002	0.491844	0.0869816	0.12307	MASS::glm.nb
Firmicutes	2.21763	5.67251e-05	0.000419135	1.13036	0.527274	0.701274	0.706394	0.00121217	0.00282839	log nlme::gls
Firmicutes_Bacilli	2.2462	5.74201e-08	7.63688e-07	2.01015	2.83327e-05	0.000221662	1.46966	0.000812469	0.00200108	log nlme::gls
Firmicutes_Bacilli_Bacillales	1.38032	0.153331	0.333668	0.780526	0.332567	0.531578	0.685677	0.0121851	0.0219003	log nlme::gls
Firmicutes_Bacilli_Bacillales_Bacillaceae	0.927018	0.717565	0.782263	0.6241	0.0310256	0.0859667	0.69149	0.00543673	0.0101843	log nlme::gls
Firmicutes_Bacilli_Bacillales_Bacillaceae_Bacillus	0.927018	0.717565	0.782263	0.6241	0.0310256	0.0859667	0.69149	0.00543673	0.0101843	log nlme::gls
Firmicutes_Bacilli_Bacillales_FamilyXIIncertaeSedis	1.29588	0.416063	0.592747	0.833295	0.61231	0.748007	0.968317	0.877628	0.91191	MASS::glm.nb
Firmicutes_Bacilli_Bacillales_FamilyXIIncertaeSedis_Gemella	1.29588	0.416063	0.592747	0.833295	0.61231	0.748007	0.968317	0.877628	0.91191	MASS::glm.nb
Firmicutes_Bacilli_Bacillales_Staphylococcaceae	1.0799	0.772639	0.828717	0.897146	0.713469	0.825142	0.613064	0.00471084	0.00908031	MASS::glm.nb
Firmicutes_Bacilli_Bacillales_Staphylococcaceae_Staphylococcus	1.0799	0.772639	0.828717	0.897146	0.713469	0.825142	0.613064	0.00471084	0.00908031	MASS::glm.nb
Firmicutes_Bacilli_Lactobacillales	2.28659	3.82098e-08	5.64655e-07	2.06034	1.64754e-05	0.000136952	1.50715	0.000433381	0.00113019	log nlme::gls
Firmicutes_Bacilli_Lactobacillales_Carnobacteriaceae	1.35866	0.523525	0.656875	0.930659	0.893517	0.932512	1.80463	0.0577264	0.0853068	MASS::glm.nb
Firmicutes_Bacilli_Lactobacillales_Carnobacteriaceae_Granulicatella	1.35866	0.523525	0.656875	0.930659	0.893517	0.932512	1.80463	0.0577264	0.0853068	MASS::glm.nb
Firmicutes_Bacilli_Lactobacillales_Enterococcaceae	3.66239	2.04749e-05	0.000164308	1.42339	0.293366	0.500226	0.417426	9.44884e-06	3.7687e-05	MASS::glm.nb
Firmicutes_Bacilli_Lactobacillales_Enterococcaceae_Enterococcus	3.66239	2.04749e-05	0.000164308	1.42339	0.293366	0.500226	0.417426	9.44884e-06	3.7687e-05	MASS::glm.nb
Firmicutes_Bacilli_Lactobacillales_Lactobacillaceae	1.20548	0.688525	0.770551	9.01329	3.0193e-09	2.00784e-07	12.5142	5.0364e-22	3.34921e-20	log nlme::gls
Firmicutes_Bacilli_Lactobacillales_Lactobacillaceae_Lactobacillus	1.21865	0.672004	0.769826	9.11085	2.64582e-09	2.00784e-07	12.6292	4.73825e-22	3.34921e-20	log nlme::gls
Firmicutes_Bacilli_Lactobacillales_Streptococcaceae	1.41483	0.134989	0.316494	1.16881	0.55106	0.715962	0.892477	0.478776	0.54425	log nlme::gls
Firmicutes_Bacilli_Lactobacillales_Streptococcaceae_Streptococcus	1.41616	0.133933	0.316494	1.17001	0.548449	0.715962	0.89069	0.471093	0.540132	log nlme::gls
Firmicutes_Clostridia	2.09118	0.0254674	0.089136	0.8282	0.618653	0.748007	0.187622	4.82097e-12	9.15984e-11	log nlme::gls
Firmicutes_Clostridia_Clostridiales	2.09118	0.0254674	0.089136	0.8282	0.618653	0.748007	0.187622	4.82097e-12	9.15984e-11	log nlme::gls
Firmicutes_Clostridia_Clostridiales_Christensenellaceae	0.883251	0.587664	0.710539	1.17384	0.55985	0.715962	0.629099	0.00119511	0.00282839	log nlme::gls
Firmicutes_Clostridia_Clostridiales_Christensenellaceae_uncultured	0.883251	0.587664	0.710539	1.17384	0.55985	0.715962	0.629099	0.00119511	0.00282839	log nlme::gls
Firmicutes_Clostridia_Clostridiales_Clostridiaceae	2.22369	0.0305547	0.100869	1.14977	0.731882	0.831968	0.222511	3.31944e-10	3.67905e-09	MASS::glm.nb
Firmicutes_Clostridia_Clostridiales_Clostridiaceae_Clostridium	2.22369	0.0305547	0.100869	1.14977	0.731882	0.831968	0.222511	3.31944e-10	3.67905e-09	MASS::glm.nb
Firmicutes_Clostridia_Clostridiales_FamilyXIIncertaeSedis	0.47164	0.0530966	0.15693	0.686434	0.380452	0.579955	0.568718	0.0242835	0.0414065	MASS::glm.nb
Firmicutes_Clostridia_Clostridiales_FamilyXIIncertaeSedis_Anaerococcus	0.623253	0.397477	0.592747	1.16215	0.806824	0.874396	0.898795	0.766854	0.815932	MASS::glm.nb
Firmicutes_Clostridia_Clostridiales_FamilyXIIncertaeSedis_Finegoldia	1.45192	0.414782	0.592747	0.467732	0.146258	0.308767	0.38924	0.001968	0.00443633	MASS::glm.nb
Firmicutes_Clostridia_Clostridiales_FamilyXIIncertaeSedis_Peptoniphilus	0.25436	0.0133221	0.0536923	0.594935	0.38809	0.579955	0.502872	0.0500669	0.076539	MASS::glm.nb
Firmicutes_Clostridia_Clostridiales_Lachnospiraceae	1.42155	0.414182	0.592747	0.569992	0.241973	0.434898	0.145285	4.1161e-11	6.84301e-10	log nlme::gls
Firmicutes_Clostridia_Clostridiales_Lachnospiraceae_Anaerostipes	0.449692	0.0958031	0.245035	0.65769	0.428312	0.598482	0.414382	0.00454107	0.00901436	MASS::glm.nb
Firmicutes_Clostridia_Clostridiales_Lachnospiraceae_Blautia	0.738209	0.448844	0.615425	1.09107	0.847724	0.909253	0.260591	1.44179e-07	9.5879e-07	log nlme::gls
Firmicutes_Clostridia_Clostridiales_Lachnospiraceae_Coprococcus	0.889721	0.638011	0.74643	1.07377	0.801387	0.874396	0.52904	4.63426e-05	0.000150331	log nlme::gls
Firmicutes_Clostridia_Clostridiales_Lachnospiraceae_Dorea	3.60014	0.0166176	0.0650041	1.83753	0.302572	0.509393	0.561378	0.0963047	0.134827	MASS::glm.nb
Firmicutes_Clostridia_Clostridiales_Lachnospiraceae_IncertaeSedis	1.88401	0.191853	0.369805	0.395189	0.0609749	0.159013	0.157638	2.82633e-10	3.67905e-09	log nlme::gls
Firmicutes_Clostridia_Clostridiales_Lachnospiraceae_Pseudobutyrivibrio	1.51533	0.0743195	0.201724	0.930447	0.780942	0.872818	0.438339	1.38844e-07	9.5879e-07	log nlme::gls
Firmicutes_Clostridia_Clostridiales_Lachnospiraceae_Roseburia	0.627712	0.317583	0.512969	0.598891	0.31902	0.523823	0.441235	0.00667915	0.0123379	MASS::glm.nb
Firmicutes_Clostridia_Clostridiales_Peptostreptococcaceae	1.80252	0.0857578	0.223643	1.53021	0.257328	0.456328	0.587165	0.0219358	0.0383877	log nlme::gls
Firmicutes_Clostridia_Clostridiales_Peptostreptococcaceae_IncertaeSedis	1.98574	0.0464468	0.143661	1.72433	0.148845	0.309318	0.599468	0.026721	0.0433402	log nlme::gls
Firmicutes_Clostridia_Clostridiales_Peptostreptococcaceae_Peptostreptococcus	0.406339	0.346922	0.549294	0.370606	0.351274	0.54325	1.1509	0.816432	0.861789	MASS::glm.nb
Firmicutes_Clostridia_Clostridiales_Ruminococcaceae	0.871054	0.677215	0.769826	0.700082	0.332743	0.531578	0.278185	1.17411e-08	1.11541e-07	log nlme::gls
Firmicutes_Clostridia_Clostridiales_Ruminococcaceae_Faecalibacterium	0.914072	0.695234	0.770551	0.902559	0.685305	0.806598	0.470819	2.86435e-07	1.81409e-06	log nlme::gls
Firmicutes_Clostridia_Clostridiales_Ruminococcaceae_Flavonifractor	2.07309	0.292815	0.492967	1.82471	0.431987	0.598482	0.698932	0.425973	0.496969	MASS::glm.nb
Firmicutes_Clostridia_Clostridiales_Ruminococcaceae_IncertaeSedis	0.651166	0.0637737	0.176706	0.53919	0.0130071	0.045525	0.422974	9.92183e-09	1.01508e-07	log nlme::gls
Firmicutes_Clostridia_Clostridiales_Ruminococcaceae_Ruminococcus	0.89208	0.535436	0.665542	1.10608	0.629954	0.75481	0.61385	3.28271e-05	0.000121278	log nlme::gls
Firmicutes_Clostridia_Clostridiales_Ruminococcaceae_Subdoligranulum	0.694716	0.198027	0.376252	0.923539	0.802533	0.874396	0.532589	0.000601181	0.00153764	log nlme::gls
Firmicutes_Erysipelotrichia	0.771588	0.488303	0.636709	0.433119	0.0275795	0.0815129	0.317393	5.48537e-07	2.71637e-06	log nlme::gls
Firmicutes_Erysipelotrichia_Erysipelotrichales	0.771588	0.488303	0.636709	0.433119	0.0275795	0.0815129	0.317393	5.48537e-07	2.71637e-06	log nlme::gls
Firmicutes_Erysipelotrichia_Erysipelotrichales_Erysipelotrichaceae	0.771588	0.488303	0.636709	0.433119	0.0275795	0.0815129	0.317393	5.48537e-07	2.71637e-06	log nlme::gls
Firmicutes_Erysipelotrichia_Erysipelotrichales_Erysipelotrichaceae_IncertaeSedis	1.00715	0.989688	0.989688	0.518911	0.282184	0.493823	0.164711	5.99507e-07	2.74946e-06	MASS::glm.nb
Firmicutes_Erysipelotrichia_Erysipelotrichales_Erysipelotrichaceae_uncultured	0.854322	0.663258	0.767072	0.398083	0.0045738	0.0184338	0.420756	5.29722e-05	0.000167745	log nlme::gls
Firmicutes_Negativicutes	1.71969	0.0577129	0.163315	0.960223	0.897455	0.932512	0.853957	0.392531	0.47896	MASS::glm.nb
Firmicutes_Negativicutes_Selenomonadales	1.71969	0.0577129	0.163315	0.960223	0.897455	0.932512	0.853957	0.392531	0.47896	MASS::glm.nb
Firmicutes_Negativicutes_Selenomonadales_Acidaminococcaceae	0.0344211	2.10017e-05	0.000164308	0.0333269	0.00012261	0.00081536	0.629904	0.312737	0.38873	MASS::glm.nb
Firmicutes_Negativicutes_Selenomonadales_Acidaminococcaceae_Phascolarctobacterium	0.0407609	8.84936e-05	0.000619455	0.0387008	0.000384779	0.00213232	0.766714	0.571167	0.627811	MASS::glm.nb
Firmicutes_Negativicutes_Selenomonadales_Veillonellaceae	1.76614	0.0492549	0.148884	0.9808	0.951527	0.973485	0.867355	0.446579	0.516478	MASS::glm.nb
Firmicutes_Negativicutes_Selenomonadales_Veillonellaceae_Dialister	3.32355	0.0310949	0.100869	6.25347	0.00277662	0.0115403	1.79343	0.111174	0.152435	MASS::glm.nb
Firmicutes_Negativicutes_Selenomonadales_Veillonellaceae_Megasphaera	0.36126	0.209083	0.386222	0.42538	0.33973	0.531578	0.136647	0.000159003	0.000459725	MASS::glm.nb
Firmicutes_Negativicutes_Selenomonadales_Veillonellaceae_Veillonella	1.83331	0.0394931	0.125062	0.902546	0.752073	0.847675	0.88711	0.528997	0.596243	MASS::glm.nb
Proteobacteria	1.4505	0.119648	0.297547	0.621071	0.0705928	0.180555	0.461965	5.71868e-07	2.71637e-06	MASS::glm.nb
Proteobacteria_Betaproteobacteria	0.652964	0.0830499	0.220913	0.688697	0.167575	0.342884	0.781346	0.117607	0.154869	log nlme::gls
Proteobacteria_Betaproteobacteria_Burkholderiales	0.699286	0.13802	0.316494	0.732564	0.239994	0.434898	0.816882	0.190051	0.23846	log nlme::gls
Proteobacteria_Betaproteobacteria_Burkholderiales_Alcaligenaceae	0.601683	0.0116515	0.0484265	0.570112	0.0101145	0.0363575	0.775666	0.0776567	0.112265	log nlme::gls
Proteobacteria_Betaproteobacteria_Burkholderiales_Alcaligenaceae_Bordetella	0.762083	0.136523	0.316494	0.67055	0.0401888	0.109084	0.784446	0.0475265	0.0752502	log nlme::gls
Proteobacteria_Betaproteobacteria_Burkholderiales_Burkholderiaceae	1.30233	0.175055	0.349372	1.5097	0.0585029	0.155618	1.22692	0.10159	0.140744	log nlme::gls
Proteobacteria_Betaproteobacteria_Burkholderiales_Burkholderiaceae_Burkholderia	1.27429	0.20763	0.386222	1.60566	0.0288519	0.0834197	1.21162	0.119745	0.156139	log nlme::gls
Proteobacteria_Betaproteobacteria_Burkholderiales_Oxalobacteraceae	0.895542	0.470617	0.632243	0.869166	0.404359	0.584563	0.869513	0.162521	0.20784	log nlme::gls
Proteobacteria_Betaproteobacteria_Burkholderiales_Oxalobacteraceae_Oxalobacter	0.895542	0.470617	0.632243	0.869166	0.404359	0.584563	0.869513	0.162521	0.20784	log nlme::gls
Proteobacteria_Betaproteobacteria_Neisseriales	0.578761	0.389036	0.587975	0.419226	0.229237	0.425256	0.395813	0.0258886	0.0425085	MASS::glm.nb
Proteobacteria_Betaproteobacteria_Neisseriales_Neisseriaceae	0.578761	0.389036	0.587975	0.419226	0.229237	0.425256	0.395813	0.0258886	0.0425085	MASS::glm.nb
Proteobacteria_Betaproteobacteria_Neisseriales_Neisseriaceae_Neisseria	0.578761	0.389036	0.587975	0.419226	0.229237	0.425256	0.395813	0.0258886	0.0425085	MASS::glm.nb
Proteobacteria_Deltaproteobacteria	0.576629	0.155544	0.333668	0.175801	0.00014636	0.000846342	0.391608	0.000207297	0.00055141	MASS::glm.nb
Proteobacteria_Deltaproteobacteria_Desulfovibrionales	0.576629	0.155544	0.333668	0.175801	0.00014636	0.000846342	0.391608	0.000207297	0.00055141	MASS::glm.nb
Proteobacteria_Deltaproteobacteria_Desulfovibrionales_Desulfovibrionaceae	0.576629	0.155544	0.333668	0.175801	0.00014636	0.000846342	0.391608	0.000207297	0.00055141	MASS::glm.nb
Proteobacteria_Deltaproteobacteria_Desulfovibrionales_Desulfovibrionaceae_Bilophila	0.0950944	0.00480032	0.0255377	0.0239731	0.00093303	0.00477281	0.323558	0.023705	0.0409449	MASS::glm.nb
Proteobacteria_Deltaproteobacteria_Desulfovibrionales_Desulfovibrionaceae_Desulfovibrio	1.21581	0.639778	0.74643	0.467254	0.118849	0.277315	0.601599	0.0674869	0.0986347	MASS::glm.nb
Proteobacteria_Gammaproteobacteria	1.45834	0.120808	0.297547	0.621086	0.075634	0.189799	0.460687	8.16974e-07	3.62192e-06	MASS::glm.nb
Proteobacteria_Gammaproteobacteria_Aeromonadales	0.220093	0.00982245	0.0437721	8.33242e-17	0.999997	0.999997	0.243451	9.23252e-05	0.000272872	MASS::glm.nb
Proteobacteria_Gammaproteobacteria_Aeromonadales_Aeromonadaceae	0.220093	0.00982245	0.0437721	8.33242e-17	0.999997	0.999997	0.243451	9.23252e-05	0.000272872	MASS::glm.nb
Proteobacteria_Gammaproteobacteria_Aeromonadales_Aeromonadaceae_Aeromonas	0.220093	0.00982245	0.0437721	8.33242e-17	0.999997	0.999997	0.243451	9.23252e-05	0.000272872	MASS::glm.nb
Proteobacteria_Gammaproteobacteria_Enterobacteriales	1.43964	0.167219	0.347502	0.625117	0.106195	0.252214	0.470772	9.91762e-06	3.7687e-05	MASS::glm.nb
Proteobacteria_Gammaproteobacteria_Enterobacteriales_Enterobacteriaceae	1.43964	0.167219	0.347502	0.625117	0.106195	0.252214	0.470772	9.91762e-06	3.7687e-05	MASS::glm.nb
Proteobacteria_Gammaproteobacteria_Enterobacteriales_Enterobacteriaceae_Citrobacter	0.555788	0.44385	0.614917	0.538374	0.465494	0.638255	0.672509	0.423831	0.496969	MASS::glm.nb
Proteobacteria_Gammaproteobacteria_Enterobacteriales_Enterobacteriaceae_Enterobacter	1.52731	0.232933	0.402338	1.09942	0.808652	0.874396	0.423084	0.000178843	0.000506087	MASS::glm.nb
Proteobacteria_Gammaproteobacteria_Enterobacteriales_Enterobacteriaceae_Escherichia.Shigella	1.15724	0.693224	0.770551	0.501999	0.0912541	0.224756	0.556461	0.0142702	0.0253058	MASS::glm.nb
Proteobacteria_Gammaproteobacteria_Enterobacteriales_Enterobacteriaceae_Klebsiella	1.0222	0.964586	0.971893	0.49609	0.198611	0.400231	0.225347	3.18646e-06	1.36709e-05	MASS::glm.nb
Proteobacteria_Gammaproteobacteria_Enterobacteriales_Enterobacteriaceae_Salmonella	1.27394	0.80696	0.858605	1.82132	0.584828	0.733794	1.2123	0.764619	0.815932	MASS::glm.nb
Proteobacteria_Gammaproteobacteria_Pasteurellales	1.0641	0.876655	0.890039	0.363747	0.0234463	0.0742466	0.125571	2.19214e-15	5.83109e-14	MASS::glm.nb
Proteobacteria_Gammaproteobacteria_Pasteurellales_Pasteurellaceae	1.0641	0.876655	0.890039	0.363747	0.0234463	0.0742466	0.125571	2.19214e-15	5.83109e-14	MASS::glm.nb
Proteobacteria_Gammaproteobacteria_Pasteurellales_Pasteurellaceae_Haemophilus	1.0641	0.876655	0.890039	0.363747	0.0234463	0.0742466	0.125571	2.19214e-15	5.83109e-14	MASS::glm.nb
Proteobacteria_Gammaproteobacteria_Pseudomonadales	0.654532	0.178626	0.349372	0.347147	0.00219021	0.00939669	0.544701	0.00298546	0.00620416	log nlme::gls
Proteobacteria_Gammaproteobacteria_Pseudomonadales_Pseudomonadaceae	0.654532	0.178626	0.349372	0.347147	0.00219021	0.00939669	0.544701	0.00298546	0.00620416	log nlme::gls
Proteobacteria_Gammaproteobacteria_Pseudomonadales_Pseudomonadaceae_Pseudomonas	0.654532	0.178626	0.349372	0.347147	0.00219021	0.00939669	0.544701	0.00298546	0.00620416	log nlme::gls
Verrucomicrobia	11.0917	0.00163071	0.00903687	3.42843	0.143351	0.307511	1.01858	0.970333	0.970333	MASS::glm.nb
Verrucomicrobia_Verrucomicrobiae	11.0917	0.00163071	0.00903687	3.42843	0.143351	0.307511	1.01858	0.970333	0.970333	MASS::glm.nb
Verrucomicrobia_Verrucomicrobiae_Verrucomicrobiales	11.0917	0.00163071	0.00903687	3.42843	0.143351	0.307511	1.01858	0.970333	0.970333	MASS::glm.nb
Verrucomicrobia_Verrucomicrobiae_Verrucomicrobiales_Verrucomicrobiaceae	11.0917	0.00163071	0.00903687	3.42843	0.143351	0.307511	1.01858	0.970333	0.970333	MASS::glm.nb
Verrucomicrobia_Verrucomicrobiae_Verrucomicrobiales_Verrucomicrobiaceae_Akkermansia	11.0917	0.00163071	0.00903687	3.42843	0.143351	0.307511	1.01858	0.970333	0.970333	MASS::glm.nb
Carbohydrate-active enzymes targeting
Animal carbohydrates	0.849234	0.0079738	0.017009	1.11522	0.000460179	0.00152432	1.13416	6.57062e-08	0.00152432	nlme::gls
Plant cell wall carbohydrates	0.829437	0.00417679	0.0146188	1.12062	0.000653282	0.00152432	1.1436	4.15302e-08	0.00152432	nlme::gls
Peptidoglycan	0.942467	0.379358	0.407824	1.0337	0.322439	0.376179	1.00601	0.804107	0.376179	nlme::gls
Starch	0.83196	0.00333405	0.0146188	1.05806	0.062309	0.0872326	1.06274	0.00439972	0.0872326	nlme::gls
Sugar	0.950972	0.407824	0.407824	1.09218	0.00675255	0.011817	1.05091	0.0238709	0.011817	nlme::gls
Fungal	0.847633	0.00971944	0.017009	1.1153	0.000458881	0.00152432	1.12533	2.86569e-07	0.00152432	nlme::gls
Dextran	1.28519	0.100949	0.141329	1.02213	0.896714	0.896714	0.756121	0.00468804	0.896714	MASS::glm.nb

## Sheet: suppltable4_birth_proteome
taxon	ControlSection_estimate_FoldChange	ControlSection_p	ControlSection_p_FDR	ProbioticSection_estimate_FoldChange	ProbioticSection_p	ProbioticSection_p_FDR	ProbioticVaginal_estimate_FoldChange	ProbioticVaginal_p	ProbioticVaginal_p_FDR	model
phosphotransferasesystemEIIC	8.48186e-14	0.999958	0.999958	1.13308	0.926867	0.99994	0.334587	0.426115	0.826404	MASS::glm.nb
peroxiredoxin	7.09269e-11	0.999346	0.999958	0.531307	0.68524	0.913653	2.75884	0.485549	0.854621	MASS::glm.nb
O.acetylhomoserinesulfhydrylase	0.0462182	4.18723e-06	0.000214386	2.54908	0.0963242	0.277067	1.86391	0.259841	0.684299	MASS::glm.nb
glutamate..ammonialigase	0.0899169	0.000415471	0.0151944	1.02604	0.967054	0.99994	1.3705	0.605047	0.88816	MASS::glm.nb
xyloseABCtransporter	0.16686	0.0466232	0.362711	0.485432	0.401246	0.720683	0.668613	0.632168	0.88816	MASS::glm.nb
putativeseleniummetabolismhydrolase	0.179204	0.296538	0.751703	0.141846	0.229017	0.509811	1.24472	0.884857	0.974509	MASS::glm.nb
SusC.RagAfamilyTonB.linkedoutermembrane	0.200312	0.325855	0.758354	0.637111	0.771537	0.954171	1.60834	0.75301	0.92578	MASS::glm.nb
predictedprotein	0.273818	0.188959	0.671856	0.128343	0.0413269	0.178803	0.749237	0.752363	0.92578	MASS::glm.nb
translationelongationfactorG	0.277197	0.30206	0.751703	0.754437	0.810266	0.972784	0.649499	0.707747	0.905238	MASS::glm.nb
transaldolaseB	0.280852	0.432279	0.834813	0.437755	0.590304	0.86353	0.155192	0.237129	0.652922	MASS::glm.nb
ribosomalproteinS4	0.30271	0.362017	0.779023	0.981423	0.988216	0.99994	0.152105	0.141773	0.518484	MASS::glm.nb
phosphoglucomutasealpha.D.glucosephosphate.specific	0.303055	0.0383408	0.362711	1.33224	0.585713	0.86353	1.15954	0.774378	0.926359	MASS::glm.nb
Ser.Thrphosphatasefamilyprotein	0.316749	0.0113277	0.223069	0.244327	0.00190751	0.0195329	0.534988	0.103984	0.444867	MASS::glm.nb
rubrerythrin	0.331256	0.228476	0.722098	0.752221	0.744501	0.943526	1.36433	0.71429	0.905238	MASS::glm.nb
carbamoyl.phosphatesynthaselargesubunit	0.331364	0.0313153	0.362711	1.05429	0.910265	0.99994	0.294729	0.0113184	0.157022	MASS::glm.nb
DNAphosphorothioation.dependentrestrictionprotein	0.342252	0.470481	0.83641	0.358723	0.477381	0.768613	0.476407	0.593751	0.88816	MASS::glm.nb
phosphoglyceratemutase	0.349643	0.3104	0.751703	0.948643	0.956367	0.99994	0.819358	0.833008	0.952009	MASS::glm.nb
O.acetylhomoserine.thiol..lyase	0.354964	0.154736	0.582536	0.178281	0.0142523	0.0912146	0.375107	0.177377	0.582159	log nlme::gls
ribosomalproteinL1	0.356121	0.218241	0.720228	0.536046	0.432378	0.740241	0.393477	0.233342	0.652922	MASS::glm.nb
X5..Nucleotidasedomain.containingprotein	0.360653	0.0482553	0.362711	0.0953214	2.7106e-05	0.000578261	0.308888	0.0170691	0.188066	MASS::glm.nb
DNA.directedDNApolymeraseIII	0.365594	0.266736	0.751703	1.40476	0.651075	0.896103	0.799283	0.766662	0.92578	MASS::glm.nb
TonB.dependentreceptor	0.367904	0.0488897	0.362711	0.488721	0.128612	0.342966	1.24129	0.614065	0.88816	MASS::glm.nb
glyceraldehyde3.phosphatedehydrogenaseC	0.371659	0.451572	0.834813	0.157399	0.159794	0.389593	0.425646	0.507178	0.854621	MASS::glm.nb
conservedhypotheticalprotein	0.400872	0.00411659	0.105385	0.57847	0.0826985	0.25507	1.02351	0.940001	0.993101	MASS::glm.nb
alpha.galactosidase	0.405849	0.0323852	0.362711	0.70264	0.298301	0.591977	0.324224	0.00295035	0.0755291	MASS::glm.nb
mandelateracemase.muconatelactonizingprotein	0.414839	1.3066e-09	1.11497e-07	2.22855	8.54927e-18	3.64769e-16	0.790412	0.0237085	0.216529	MASS::glm.nb
peptidaseM20.M25.M40family	0.427572	0.400642	0.814004	0.771481	0.786865	0.968449	0.847825	0.85981	0.971141	MASS::glm.nb
L.lactatedehydrogenase	0.435935	0.0966896	0.462617	1.50009	0.354723	0.66284	0.752508	0.518982	0.868362	MASS::glm.nb
O.acetylhomoserineaminocarboxypropyltransferase.cysteinesynthase	0.438848	0.495194	0.848025	0.598235	0.668862	0.905971	0.528926	0.588967	0.88816	MASS::glm.nb
TonB.linkedoutermembraneproteinSusC.RagA	0.440478	0.0761846	0.382417	0.228868	0.00243302	0.0207855	0.978948	0.958104	0.997624	MASS::glm.nb
phosphoenolpyruvatecarboxykinase.ATP.	0.440939	0.186875	0.671856	0.307325	0.0511338	0.204561	0.726949	0.640526	0.88816	log nlme::gls
putativeoutermembraneporinprotein	0.441784	0.0248548	0.353491	0.86915	0.623614	0.89034	0.256677	0.000187741	0.00686595	MASS::glm.nb
bacterialsurfaceprotein	0.441983	0.654677	0.938796	0.284245	0.488939	0.777443	0.0873785	0.185886	0.589709	MASS::glm.nb
prolylaminopeptidase	0.448544	0.559569	0.890872	0.341462	0.428765	0.740241	1.03457	0.97873	0.997624	MASS::glm.nb
UDP.glucose4.epimerase	0.463111	0.311252	0.751703	2.28875	0.253814	0.54602	1.6046	0.507431	0.854621	MASS::glm.nb
dipeptideABCsuperfamilyATP	0.482665	0.216353	0.720228	1.85098	0.278433	0.565705	1.0661	0.908907	0.982718	MASS::glm.nb
phosphatebindingprotein	0.499881	0.140578	0.582536	0.164961	0.00043739	0.00658657	0.377011	0.0297452	0.220986	MASS::glm.nb
L.arabinoseisomerase	0.511292	0.135985	0.582536	0.282888	0.00533537	0.0401722	0.492812	0.0984746	0.444211	MASS::glm.nb
phosphate.bindingtransportproteinofABC	0.517805	0.488577	0.848025	0.25641	0.152045	0.380492	0.686117	0.684989	0.904777	MASS::glm.nb
mandelateracemase.muconatelactonizingenzymedomain	0.519019	8.03026e-09	5.13937e-07	2.95244	7.81211e-46	3.9998e-44	2.27557	6.64829e-28	5.6732e-26	MASS::glm.nb
S.adenosylmethioninesynthase	0.524995	0.145946	0.582536	0.524494	0.127884	0.342966	0.842213	0.647593	0.88816	MASS::glm.nb
Tatpathwaysignalsequencedomain	0.529394	0.241711	0.745519	0.368976	0.0560919	0.207531	0.674207	0.487859	0.854621	log nlme::gls
dipeptideABCtransportersubstratebinding	0.531069	0.30868	0.751703	0.395877	0.132447	0.34955	0.988523	0.984433	0.997624	MASS::glm.nb
endo.alpha.N.acetylgalactosaminidase	0.537597	0.44469	0.834813	0.190693	0.0252419	0.131876	0.366665	0.188832	0.589709	log nlme::gls
transaldolase	0.546915	0.0362094	0.362711	0.809901	0.455901	0.748145	1.07609	0.790791	0.937233	MASS::glm.nb
dihydrodipicolinatereductase	0.549623	0.563755	0.890872	0.838447	0.861304	0.984347	0.0770981	0.0203656	0.196271	MASS::glm.nb
adenylosuccinatelyase	0.558439	0.674735	0.954322	3.69621	0.297397	0.591977	1.38499	0.794822	0.937671	MASS::glm.nb
malicenzymeNADbindingdomain	0.577404	0.506015	0.848025	2.56722	0.201528	0.456558	0.472137	0.335476	0.715815	MASS::glm.nb
outermembraneproteinOmp121	0.586397	0.26007	0.748066	0.453641	0.0953475	0.277067	1.85969	0.11375	0.461168	MASS::glm.nb
ABCtransportersubstrate.bindingcomponent	0.601875	0.36425	0.779023	2.10277	0.13548	0.353906	1.6475	0.308651	0.710147	MASS::glm.nb
aspartatecarbamoyltransferase	0.604255	0.723764	0.97602	1.06614	0.96232	0.99994	0.533648	0.643061	0.88816	MASS::glm.nb
ribosomalproteinL23	0.604472	0.363987	0.779023	1.17852	0.744252	0.943526	0.586351	0.297457	0.710147	MASS::glm.nb
Rubrerythrin	0.607633	0.292412	0.751703	0.205027	0.00205825	0.0200126	0.71164	0.440108	0.828438	MASS::glm.nb
D.xylulose5.phosphate.D.fructose6.phosphatephosphoketolase	0.610304	0.462933	0.834813	0.186293	0.0130887	0.0859157	0.29078	0.0609719	0.325184	MASS::glm.nb
aspartyl.glutamyl.tRNA.Asn.Gln.amidotransferaseAsubunit	0.611248	0.0495893	0.362711	2.38105	1.75119e-06	4.98117e-05	0.9015	0.602038	0.88816	MASS::glm.nb
succinyl.CoA.coenzymeAtransferase	0.63448	0.658425	0.938796	4.71144	0.107064	0.304537	1.45965	0.692306	0.904777	MASS::glm.nb
hypotheticalprotein	0.637945	0.0656432	0.382417	0.647264	0.0739931	0.246003	0.536517	0.00916846	0.1436	MASS::glm.nb
hyalurononglucosaminidase	0.639358	0.572062	0.892854	0.190704	0.0178234	0.101145	0.346295	0.14022	0.518484	log nlme::gls
ribonucleoside.diphosphatereductasesubunitalpha	0.640115	0.286542	0.751703	0.763405	0.493009	0.779076	0.79599	0.543838	0.881156	MASS::glm.nb
X30SribosomalproteinS2	0.643375	0.755298	0.97602	1.37306	0.81601	0.972784	0.314476	0.404205	0.809682	MASS::glm.nb
dihydrodipicolinatesynthasefamilyprotein	0.645526	0.305398	0.751703	0.994656	0.988731	0.99994	0.959888	0.909782	0.982718	MASS::glm.nb
conserveddomainprotein	0.646749	0.774688	0.97602	1.76147	0.700143	0.919162	0.163047	0.239745	0.652922	MASS::glm.nb
aldose1.epimerasefamilyprotein	0.647574	0.449165	0.834813	1.03628	0.949306	0.99994	1.00973	0.985933	0.997624	MASS::glm.nb
aminoacyl.histidinedipeptidase	0.664002	0.331215	0.758811	0.402847	0.0372778	0.17116	1.25488	0.537077	0.881156	MASS::glm.nb
ABC.typeaminoacidtransportsystem	0.664961	0.74167	0.97602	0.923503	0.947144	0.99994	0.589248	0.655712	0.88816	MASS::glm.nb
alkalinephosphatase	0.668285	0.767802	0.97602	0.011207	0.0024358	0.0207855	0.649333	0.746731	0.92578	MASS::glm.nb
X6.phospho.beta.galactosidase	0.678356	0.399862	0.814004	0.400283	0.0511403	0.204561	0.562604	0.187048	0.589709	MASS::glm.nb
bilesalthydrolase	0.683115	0.440642	0.834813	0.190787	0.00211071	0.0200126	0.624783	0.316237	0.710147	MASS::glm.nb
malatedehydrogenaseNAD.dependent	0.726789	0.398089	0.814004	0.595734	0.165941	0.394998	0.893197	0.764064	0.92578	log nlme::gls
ABC.typeoligopeptidetransportsystem	0.750335	0.0140578	0.257057	1.67876	4.45783e-08	1.42651e-06	1.26424	0.011654	0.157022	MASS::glm.nb
ABCtransportersolute.bindingprotein	0.751494	0.504482	0.848025	0.192051	0.00063907	0.00779057	0.293901	0.00452297	0.105262	MASS::glm.nb
alpha.fucosidase	0.759219	0.704759	0.97602	0.26973	0.0360326	0.170821	0.41683	0.173204	0.577681	log nlme::gls
glucosamine.6.phosphatedeaminase	0.761576	0.537531	0.876483	0.701384	0.413885	0.725716	1.12323	0.781755	0.930834	MASS::glm.nb
NADP.specificglutamatedehydrogenase	0.765387	0.862072	0.985226	2.26731	0.586843	0.86353	0.651434	0.773939	0.926359	MASS::glm.nb
putativesugarABCtransportersubstrate	0.77501	0.628866	0.930577	2.96688	0.0181745	0.101145	2.48465	0.0445839	0.26543	MASS::glm.nb
extracellularsolute.bindingprotein	0.778287	0.71758	0.97602	0.291904	0.0385127	0.172969	0.461451	0.209215	0.630107	log nlme::gls
carbohydrateABCtransportersubstrate.bindingprotein	0.780293	0.18782	0.671856	0.145686	3.74959e-09	1.37128e-07	0.693361	0.0306276	0.220986	MASS::glm.nb
lacto.N.biosephosphorylase	0.780562	0.660091	0.938796	0.656003	0.448116	0.74492	0.456444	0.152563	0.538372	MASS::glm.nb
alcoholdehydrogenaseiron.dependent	0.782283	0.580874	0.895805	0.292872	0.0114351	0.0770364	0.804702	0.599755	0.88816	MASS::glm.nb
branched.chainaminoacidaminotransferase	0.784168	0.575472	0.892854	0.14587	0.000104555	0.00205894	0.354327	0.0155488	0.188066	MASS::glm.nb
dihydrolipoyldehydrogenase	0.784635	0.604318	0.920866	1.9753	0.0918367	0.277067	1.04984	0.905911	0.982718	MASS::glm.nb
aminopeptidaseC	0.79894	0.626156	0.930577	0.472377	0.0738614	0.246003	0.374453	0.0207005	0.196271	log nlme::gls
ribosomalproteinS10	0.836179	0.652453	0.938796	0.947878	0.886905	0.99994	0.62149	0.206883	0.630107	MASS::glm.nb
phosphateABCtransporterphosphate.bindingprotein	0.852567	0.812917	0.97602	3.45502	0.0626958	0.222918	2.69497	0.129526	0.494906	MASS::glm.nb
ABCtransportersubstrate.bindingprotein	0.863732	0.823993	0.97602	4.16319	0.0266226	0.136308	1.57132	0.475964	0.854621	MASS::glm.nb
cellulase.glycosylhydrolasefamily5.	0.880264	0.873873	0.985357	0.558723	0.468825	0.759615	0.376776	0.220847	0.642464	MASS::glm.nb
glyceraldehyde.3.phosphatedehydrogenasetypeI	0.886594	0.620783	0.930577	1.03235	0.887754	0.99994	1.35093	0.124762	0.491369	nlme::gls
outermembraneprotein	0.887008	0.795937	0.97602	0.943057	0.898651	0.99994	0.598083	0.28291	0.710147	log nlme::gls
dipeptidase	0.887751	0.800658	0.97602	0.969536	0.946599	0.99994	1.23148	0.643368	0.88816	MASS::glm.nb
argininosuccinatesynthase	0.905076	0.804719	0.97602	0.77464	0.520009	0.804813	1.15517	0.690281	0.904777	MASS::glm.nb
ribosomalproteinL5	0.910901	0.821608	0.97602	1.30605	0.483692	0.773908	1.44855	0.30798	0.710147	MASS::glm.nb
aspartyl.glutamyl.tRNA.Asn.Gln.amidotransferaseBsubunit	0.91142	0.85734	0.98434	1.10506	0.847995	0.983147	0.677014	0.436166	0.828438	log nlme::gls
galactose.1.phosphateuridylyltransferase	0.912063	0.837805	0.97602	0.541649	0.184518	0.431056	0.736535	0.471916	0.854621	MASS::glm.nb
putativeLPXTG.motifproteincellwall	0.918075	0.789877	0.97602	1.06423	0.852573	0.983147	0.669293	0.173755	0.577681	log nlme::gls
bifunctionalphosphoribosylaminoimidazolecarboxamideformyltransferase.IMPcyclohydrolase	0.923667	0.851539	0.98434	0.85764	0.711372	0.929139	0.447622	0.0277833	0.220986	log nlme::gls
cconservedhypotheticalprotein	0.926911	0.832166	0.97602	0.646036	0.157266	0.387116	1.33103	0.537684	0.881156	log nlme::gls
phosphoglyceratekinase	0.930654	0.701268	0.97602	0.474736	0.000633894	0.00779057	1.02349	0.886955	0.974509	MASS::glm.nb
sialidaseA	0.933418	0.836271	0.97602	1.0447	0.899136	0.99994	0.610592	0.100641	0.444211	log nlme::gls
ribosomalproteinL10	0.933418	0.838767	0.97602	0.972832	0.935932	0.99994	0.736114	0.330713	0.715815	log nlme::gls
beta.galactosidase	0.934389	0.884487	0.985357	1.5529	0.343627	0.656481	1.27892	0.58968	0.88816	MASS::glm.nb
ribosomalproteinS7	0.936889	0.836396	0.97602	0.932577	0.824972	0.977745	0.59192	0.0898587	0.442381	log nlme::gls
dihydrodipicolinatesynthetasefamily	0.936889	0.857452	0.98434	0.652991	0.166231	0.394998	0.925971	0.828109	0.952009	log nlme::gls
flavodoxin.likeprotein	0.964786	0.973138	0.999958	5.56767	0.0599651	0.216212	2.16317	0.405096	0.809682	MASS::glm.nb
ribosomalproteinL6	0.964972	0.972079	0.999958	0.324478	0.290105	0.584778	1.48761	0.679695	0.904777	MASS::glm.nb
beta.galactosidase1	0.970397	0.955053	0.999958	0.324026	0.04156	0.178803	1.34602	0.557644	0.88816	MASS::glm.nb
deoxyribose.phosphatealdolase	0.976098	0.954242	0.999958	0.771719	0.537264	0.818688	1.23883	0.572208	0.88816	MASS::glm.nb
lacto.N.biosidase	0.992404	0.983597	0.999958	0.363013	0.016814	0.0987989	0.362689	0.00953591	0.1436	MASS::glm.nb
X50SribosomalproteinL11	0.993211	0.985475	0.999958	0.616721	0.114365	0.314811	0.769807	0.418074	0.823284	log nlme::gls
inorganicdiphosphatase	0.996304	0.994011	0.999958	0.962715	0.937585	0.99994	1.03569	0.940997	0.993101	MASS::glm.nb
branched.chain.amino.acidtransaminase	0.997728	0.997057	0.999958	5.18543	0.00126466	0.0140762	2.70801	0.0546257	0.316902	log nlme::gls
ribosomalproteinL24	1.00867	0.991788	0.999958	1.21329	0.813736	0.972784	1.02313	0.977348	0.997624	MASS::glm.nb
catalase	1.01665	0.967436	0.999958	0.580243	0.0929036	0.277067	0.844053	0.636849	0.88816	log nlme::gls
murein.lipoprotein	1.02014	0.962051	0.999958	0.905848	0.811608	0.972784	0.548038	0.129293	0.494906	log nlme::gls
pyruvatekinase	1.02827	0.956286	0.999958	0.65227	0.402569	0.720683	1.33676	0.54133	0.881156	MASS::glm.nb
SusDfamilyprotein	1.03151	0.977282	0.999958	1.5178e-12	0.999908	0.99994	5.95758	0.0569433	0.316902	MASS::glm.nb
putativeendoribonucleaseL.PSP	1.04042	0.908235	0.989396	1.06871	0.845971	0.983147	0.774253	0.475439	0.854621	log nlme::gls
ribulose.phosphate3.epimerase	1.04182	0.929428	0.999958	0.981075	0.966118	0.99994	1.02933	0.946549	0.993101	MASS::glm.nb
repeatedsequencefoundin	1.04667	0.895789	0.987486	0.850086	0.639649	0.89596	0.709674	0.30634	0.710147	MASS::glm.nb
DNAprotectionduringstarvationprotein	1.05573	0.898767	0.987486	1.26199	0.56681	0.848558	0.667528	0.327877	0.715815	MASS::glm.nb
PRABACTJOHhypotheticalprotein	1.05742	0.889131	0.985357	0.511537	0.0336271	0.162425	1.59942	0.368971	0.76794	log nlme::gls
sugarABCtransportersubstratebinding	1.05957	0.906283	0.989396	1.29484	0.588632	0.86353	0.674103	0.408004	0.809682	MASS::glm.nb
X5.methyltetrahydropteroyltriglutamate.homocysteinemethyltransferase	1.06324	0.881422	0.985357	0.626395	0.256353	0.546887	0.553388	0.141378	0.518484	MASS::glm.nb
ooligoendopeptidase	1.07706	0.869922	0.985357	1.01193	0.979168	0.99994	0.676759	0.389601	0.791571	log nlme::gls
ribosomalproteinL29	1.10968	0.764965	0.97602	1.1066	0.771297	0.954171	1.03595	0.919703	0.9832	nlme::gls
oligopeptideABCtransportersubstratebinding	1.11058	0.781371	0.97602	0.844815	0.662586	0.902244	0.66376	0.291495	0.710147	log nlme::gls
aminoglycosidephosphotransferase	1.11464	0.795731	0.97602	0.448869	0.0824279	0.25507	0.831527	0.644467	0.88816	MASS::glm.nb
putativephosphoserineaminotransferase	1.11773	0.785646	0.97602	2.42505	0.000957994	0.0111476	1.43683	0.315397	0.710147	nlme::gls
beta.fructofuranosidase	1.11891	0.731873	0.97602	0.515406	0.0374412	0.17116	0.519778	0.0368238	0.248076	log nlme::gls
lipopolysaccharideABCsuperfamilyATP	1.13159	0.77784	0.97602	0.855862	0.693346	0.919162	0.491188	0.0410733	0.250466	log nlme::gls
glutaminesynthetasetypeI	1.14156	0.034179	0.362711	2.30693	1.29643e-54	1.10629e-52	1.66346	1.14469e-21	5.86082e-20	MASS::glm.nb
argininosuccinatelyase	1.14447	0.74469	0.97602	0.797672	0.542558	0.821864	0.468899	0.0245286	0.216529	log nlme::gls
chaperoninGroL	1.14681	0.766263	0.97602	0.741889	0.519396	0.804813	0.585932	0.23947	0.652922	MASS::glm.nb
alpha.13.4.fucosidase	1.14786	0.934253	0.999958	0.441026	0.626021	0.89034	0.420038	0.597799	0.88816	MASS::glm.nb
glutaminesynthetase	1.15406	0.806892	0.97602	0.0864445	0.000142872	0.00261252	0.528345	0.266893	0.684299	MASS::glm.nb
phosphoribosylformylglycinamidinesynthase	1.15801	0.737636	0.97602	2.12531	0.0778254	0.253343	1.82743	0.150922	0.538372	MASS::glm.nb
translationelongationfactorTs	1.1661	0.929269	0.999958	0.761718	0.874658	0.995166	2.27698	0.613435	0.88816	MASS::glm.nb
enolase	1.17086	0.815778	0.97602	0.874348	0.842376	0.983147	0.937039	0.92175	0.9832	MASS::glm.nb
phosphoenolpyruvatecarboxykinase	1.17121	0.650462	0.938796	0.673786	0.125141	0.34081	1.79061	0.267304	0.684299	log nlme::gls
amidohydrolasefamilyprotein	1.17835	0.722663	0.97602	1.38641	0.463413	0.755628	0.93242	0.874234	0.974509	MASS::glm.nb
glutamatedehydrogenase	1.17944	0.869218	0.985357	0.421656	0.389786	0.707697	1.9559	0.493605	0.854621	MASS::glm.nb
triose.phosphateisomerase	1.20104	0.819398	0.97602	0.0701193	0.00282005	0.0232881	0.733226	0.692192	0.904777	MASS::glm.nb
SSUribosomalproteinS8P	1.2128	0.488634	0.848025	1.26485	0.452064	0.746635	1.11069	0.631411	0.88816	log nlme::gls
aminotransferaseclassI.II	1.21867	0.635263	0.93464	0.920958	0.84259	0.983147	0.7493	0.47657	0.854621	MASS::glm.nb
X50SribosomalproteinL19	1.22176	0.562587	0.890872	0.834642	0.621042	0.89034	1.00752	0.981464	0.997624	MASS::glm.nb
glutamyl.tRNA.Gln.amidotransferaseAsubunit	1.22284	0.651572	0.938796	1.08521	0.851284	0.983147	1.03063	0.94288	0.993101	MASS::glm.nb
S.ribosylhomocysteinaseLuxS	1.22473	0.546245	0.882365	1.07824	0.816986	0.972784	0.528767	0.0271436	0.220986	log nlme::gls
glutaminesynthetase1	1.22608	0.757887	0.97602	0.856081	0.813125	0.972784	1.63676	0.439943	0.828438	MASS::glm.nb
endoribonucleaseL.PSPfamilyprotein	1.23467	0.627291	0.930577	0.639878	0.185219	0.431056	0.711692	0.319286	0.710758	log nlme::gls
peroxidase	1.23904	0.88758	0.985357	3.65951	0.367341	0.681444	1.5426	0.762563	0.92578	MASS::glm.nb
cellwallsurfaceanchorfamily	1.24474	0.714105	0.97602	0.466417	0.0556745	0.207531	0.987896	0.980437	0.997624	log nlme::gls
glycogenphosphorylase	1.25045	0.0410225	0.362711	0.879486	0.263085	0.552048	0.885441	0.246669	0.657784	MASS::glm.nb
dihydroorotateoxidasefamilyprotein	1.25072	0.506827	0.848025	1.54491	0.225046	0.505367	0.871492	0.651096	0.88816	log nlme::gls
mucin.desulfatingsulfatase	1.25072	0.50476	0.848025	1.9544	0.0674406	0.233308	0.888199	0.704921	0.905238	log nlme::gls
putativealpha.L.fucosidase2	1.25072	0.513636	0.853837	3.55979	0.00153795	0.0164048	0.932203	0.830063	0.952009	log nlme::gls
phosphoenolpyruvate.proteinphosphotransferase	1.25072	0.455738	0.834813	1.19029	0.521871	0.804813	1.21097	0.483704	0.854621	log nlme::gls
ribosomalproteinL18	1.25072	0.418515	0.824153	1.36433	0.302678	0.593972	1.212	0.463288	0.854621	log nlme::gls
glutamatedehydrogenaseNADP.specific	1.26256	0.0364277	0.362711	4.07791	1.39509e-52	8.92859e-51	2.73307	9.79068e-28	6.26603e-26	MASS::glm.nb
oxidoreductasepyridinenucleotide.disulfideclassI	1.27627	0.502524	0.848025	0.998462	0.996615	0.99994	0.750954	0.422577	0.8258	log nlme::gls
ketol.acidreductoisomerase	1.28519	0.27591	0.751703	1.11251	0.643364	0.89596	0.950341	0.816465	0.94577	MASS::glm.nb
alkalinephosphatasefamilyprotein	1.30387	0.598977	0.918192	0.510218	0.190023	0.438251	0.605488	0.311144	0.710147	MASS::glm.nb
ribosomalproteinL4.L1familyprotein	1.31839	0.404995	0.816368	2.08396	0.0726673	0.246003	1.66797	0.153537	0.538372	log nlme::gls
solutebindingproteinofABC	1.32771	0.0020584	0.0585501	1.46426	1.37856e-05	0.000320829	1.10906	0.22812	0.648874	MASS::glm.nb
CjaAprotein	1.33586	0.344135	0.766075	1.38283	0.303947	0.593972	1.08673	0.745312	0.92578	log nlme::gls
glyceraldehyde.3.phosphatedehydrogenaseA	1.33946	0.427859	0.834813	0.721575	0.152618	0.380492	1.61776	0.292941	0.710147	log nlme::gls
ribosomalproteinL14	1.39236	0.410422	0.820843	2.36753	0.0169313	0.0987989	2.17947	0.0255678	0.218179	MASS::glm.nb
L.fucoseisomerase	1.39622	0.51931	0.857699	0.780188	0.631404	0.893035	1.32603	0.576947	0.88816	MASS::glm.nb
beta.galactosidasetrimerizationdomainprotein	1.39834	0.680219	0.956791	9.63611	0.00404511	0.0313803	6.70269	0.0140827	0.180259	MASS::glm.nb
X23.bisphosphoglycerate.independentphosphoglyceratemutase	1.40486	0.749282	0.97602	0.107695	0.0567467	0.207531	0.772632	0.804096	0.938508	MASS::glm.nb
acetatekinase	1.43019	0.548031	0.882365	1.89635	0.276049	0.565348	2.26359	0.155623	0.538372	MASS::glm.nb
aldehydedehydrogenase.NAD.familyprotein	1.43398	0.569273	0.892854	0.436805	0.0554886	0.207531	0.497173	0.108744	0.449009	log nlme::gls
DNA.directedRNApolymerasebetasubunit	1.43454	0.334944	0.758811	1.12611	0.728508	0.937176	0.587742	0.0670536	0.350321	log nlme::gls
ABC.typedipeptidetransportsystemprotein	1.44553	0.310101	0.751703	0.652991	0.196109	0.448248	0.723999	0.322781	0.712344	log nlme::gls
ribosomalproteinL27	1.45044	0.399805	0.814004	2.7826	0.0102485	0.0709085	1.8725	0.115292	0.461168	MASS::glm.nb
arabinoseisomerase	1.45954	0.480302	0.847982	0.330639	0.0419069	0.178803	0.169173	0.00103992	0.0332775	MASS::glm.nb
cysteinesynthaseA	1.48587	0.36821	0.779023	0.646457	0.352876	0.66284	1.07674	0.861129	0.971141	MASS::glm.nb
morphine6.dehydrogenase	1.48635	0.315316	0.754401	0.768507	0.410326	0.725716	0.922624	0.80653	0.938508	log nlme::gls
ornithinecarbamoyltransferase	1.49372	0.610793	0.925224	1.45979	0.623632	0.89034	1.40055	0.654604	0.88816	MASS::glm.nb
DNApolymeraseIIIbetasubunit	1.51204	0.219078	0.720228	1.96877	0.0804746	0.25507	2.44615	0.0363423	0.248076	log nlme::gls
DNAmismatchrepairproteinMutL	1.51207	0.251291	0.748066	0.663904	0.150585	0.380492	0.75942	0.338334	0.715815	log nlme::gls
branched.chainaminoacidABCtransporter	1.51347	0.415755	0.824153	1.25767	0.647471	0.89596	1.19823	0.711069	0.905238	MASS::glm.nb
X50SribosomalproteinL3	1.51654	0.388586	0.814004	1.50307	0.388517	0.707697	1.22297	0.664742	0.895652	MASS::glm.nb
dehydrogenase	1.52503	0.309983	0.751703	1.02033	0.954239	0.99994	0.667282	0.188891	0.589709	log nlme::gls
xylulose.5.phosphate.fructose.6.phosphatephosphoketolase	1.53751	2.99289e-37	3.8309e-35	1.67344	5.86305e-57	7.5047e-55	1.61036	2.54997e-54	3.26396e-52	MASS::glm.nb
malatedehydrogenase	1.54334	0.285134	0.751703	0.904529	0.756001	0.944079	0.889991	0.712119	0.905238	log nlme::gls
peptidaseC1.likefamily	1.55381	0.284194	0.751703	0.981746	0.965202	0.99994	0.988408	0.976784	0.997624	MASS::glm.nb
elongationfactorG	1.57864	0.787451	0.97602	0.294335	0.49713	0.780769	1.27517	0.882123	0.974509	MASS::glm.nb
cysteinedesulfuraseSufS	1.58583	0.333537	0.758811	1.44586	0.429172	0.740241	2.29645	0.059635	0.324821	MASS::glm.nb
GatB.GatEcatalyticdomainprotein	1.60129	0.214906	0.720228	1.33718	0.412494	0.725716	0.872184	0.654934	0.88816	log nlme::gls
Glu.Leu.Phe.Valdehydrogenasedimerizationdomainprotein	1.60591	0.322797	0.758129	0.308025	0.0199886	0.108874	0.648675	0.359251	0.753839	MASS::glm.nb
xyloseisomerase	1.61851	0.2557	0.748066	0.578477	0.0540975	0.207531	1.681	0.218473	0.642464	log nlme::gls
ABCtransportersubstrate.bindingproteinfamily	1.62234	0.458965	0.834813	0.317449	0.0163258	0.0987989	0.398965	0.055939	0.316902	log nlme::gls
ribosomalproteinL17	1.66056	0.145161	0.582536	1.20361	0.52689	0.807688	0.956646	0.865101	0.971342	log nlme::gls
peptidasefamilyM13	1.67196	0.74539	0.97602	3.30323	0.433735	0.740241	2.88109	0.480528	0.854621	MASS::glm.nb
translationelongationfactorTu	1.67786	0.222258	0.720228	1.92027	0.110132	0.306455	0.542057	0.164604	0.561848	MASS::glm.nb
phosphopyruvatehydratase	1.68957	0.152473	0.582536	1.65454	0.16664	0.394998	0.78745	0.506048	0.854621	MASS::glm.nb
methionineadenosyltransferase	1.7279	0.218718	0.720228	0.997434	0.995524	0.99994	1.14695	0.750409	0.92578	MASS::glm.nb
phosphoserineaminotransferase	1.7412	0.180504	0.669695	0.528278	0.0562043	0.207531	0.794933	0.504731	0.854621	log nlme::gls
glucose.6.phosphateisomerase	1.74278	0.268804	0.751703	1.09304	0.859105	0.984347	1.85394	0.207458	0.630107	MASS::glm.nb
ABCtransporterATP.bindingprotein	1.76879	0.0726187	0.382417	1.29911	0.328694	0.637468	0.842082	0.438095	0.828438	log nlme::gls
homoserinedehydrogenase	1.78786	0.110906	0.513385	0.985018	0.959912	0.99994	0.638488	0.0999823	0.444211	log nlme::gls
putativearylsulfataseA	1.79794	0.138709	0.582536	1.56706	0.240623	0.526492	0.826912	0.566336	0.88816	log nlme::gls
ribosomalproteinL15	1.82258	0.0682165	0.382417	1.92813	0.0647613	0.227108	1.48761	0.106003	0.444867	log nlme::gls
phosphateABCtransporterphosphate.binding	1.83506	0.228295	0.722098	0.54103	0.110076	0.306455	0.522631	0.0862858	0.433121	log nlme::gls
dihydrodipicolinatesynthase	1.85553	0.0647987	0.382417	2.62368	0.0032586	0.0260688	1.70901	0.0974688	0.444211	MASS::glm.nb
aspartate.semialdehydedehydrogenase	1.86368	0.150492	0.582536	0.84099	0.699615	0.919162	0.783299	0.573181	0.88816	MASS::glm.nb
X50SribosomalproteinL4	1.89245	0.075423	0.382417	1.17234	0.56307	0.847918	1.15877	0.582093	0.88816	log nlme::gls
putativefructokinase	1.92397	0.112303	0.513385	1.79917	0.144802	0.374437	2.30777	0.0292451	0.220986	MASS::glm.nb
X50SribosomalproteinL15	1.92797	0.056837	0.382417	1.13605	0.656867	0.89924	0.990491	0.971937	0.997624	log nlme::gls
phosphoglucosaminemutase	1.93021	0.270417	0.751703	3.39094	0.0328891	0.161915	1.77633	0.314252	0.710147	MASS::glm.nb
formateC.acetyltransferase	1.93996	0.468727	0.83641	0.107444	0.0206293	0.110023	0.0728947	0.00601952	0.113154	MASS::glm.nb
aldehyde.alcoholdehydrogenase2	1.94643	0.0611887	0.382417	1.30142	0.446398	0.74492	0.796986	0.498257	0.854621	log nlme::gls
pyridoxinebiosynthesisprotein	2.05545	0.149017	0.582536	2.59077	0.0464707	0.191879	3.61418	0.00518201	0.11055	MASS::glm.nb
galactokinase	2.07698	0.535099	0.876483	1.81949	0.606419	0.882064	2.65805	0.38593	0.790956	MASS::glm.nb
basicmembraneprotein	2.09853	0.0631501	0.382417	0.718889	0.442923	0.74492	0.340559	0.0176312	0.188066	MASS::glm.nb
adenylosuccinatesynthase	2.11476	0.0741275	0.382417	0.978481	0.927361	0.99994	1.35231	0.287604	0.710147	log nlme::gls
formateacetyltransferase	2.11601	0.28074	0.751703	2.67594	0.153089	0.380492	1.38781	0.629258	0.88816	MASS::glm.nb
ribosomalproteinL22	2.12241	0.367526	0.779023	2.63986	0.233924	0.516245	2.2421	0.313765	0.710147	MASS::glm.nb
aminopeptidase	2.13971	0.0481652	0.362711	1.18243	0.676814	0.907144	0.599823	0.224612	0.646076	MASS::glm.nb
transketolase	2.1703	2.2763e-58	5.82732e-56	2.22101	8.96699e-65	2.29555e-62	2.20599	1.02146e-69	2.61494e-67	MASS::glm.nb
LPXTG.domain.containingproteincellwall	2.18159	0.0686391	0.382417	1.154	0.743372	0.943526	0.377268	0.0410921	0.250466	MASS::glm.nb
SufSfamilycysteinedesulfurase	2.18916	0.135208	0.582536	5.37575	0.000613155	0.00779057	2.2864	0.0956078	0.444211	MASS::glm.nb
N.acetylglucosamine.6.phosphatedeacetylase	2.19633	0.145218	0.582536	1.13987	0.814558	0.972784	1.06647	0.906927	0.982718	log nlme::gls
ribosomalproteinL28	2.22151	0.46306	0.834813	1.06038	0.957406	0.99994	1.45389	0.723405	0.912274	MASS::glm.nb
M20.DapEfamilyproteinYgeY	2.27663	0.0629794	0.382417	2.88883	0.0462482	0.191879	0.972492	0.913747	0.982854	log nlme::gls
ribosomalproteinL13	2.3009	9.82103e-05	0.00419031	2.55698	5.65678e-06	0.000144813	2.493	4.30677e-06	0.000183756	MASS::glm.nb
rubredoxin	2.32724	0.0735369	0.382417	0.97194	0.935671	0.99994	0.731206	0.338035	0.715815	log nlme::gls
glutamatedehydrogenaseNAD.specific	2.4382	0.0975832	0.462617	1.74244	0.247239	0.536383	0.907726	0.806426	0.938508	log nlme::gls
X14.alpha.glucanbranchingenzyme	2.44397	0.367122	0.779023	5.36969	0.0781802	0.253343	3.01107	0.243994	0.657499	MASS::glm.nb
putativeglutamate..cysteineligase	2.45572	0.340547	0.764737	10.8326	0.00632672	0.04499	6.04879	0.0383376	0.248238	MASS::glm.nb
Betagalactosidasesmallchain	2.4868	0.240519	0.745519	16.4687	0.000206474	0.00352382	7.1545	0.0082297	0.140454	log nlme::gls
ABCtransportersubstratebindingcomponent	2.61054	0.0845696	0.416342	1.19439	0.75105	0.944079	1.17867	0.763673	0.92578	MASS::glm.nb
dihydroxy.aciddehydratase	2.68469	0.0423008	0.362711	5.09257	0.000551676	0.00779057	4.24666	0.00182463	0.0519006	MASS::glm.nb
X50SribosomalproteinL22	2.68667	0.0217058	0.331465	0.581556	0.269522	0.560956	1.29063	0.550424	0.886217	MASS::glm.nb
superoxidedismutase	2.75554	0.0156866	0.267718	0.603675	0.275752	0.565348	1.42977	0.386209	0.790956	MASS::glm.nb
BNR.Asp.boxrepeatprotein	2.76544	0.0533083	0.379081	1.8091	0.261112	0.552048	2.94582	0.0310762	0.220986	MASS::glm.nb
triosephosphateisomerase	2.82518	0.0373609	0.362711	0.807806	0.676735	0.907144	1.28089	0.613564	0.88816	MASS::glm.nb
X50SribosomalproteinL29	2.92068	0.259458	0.748066	0.383138	0.386692	0.707697	0.256851	0.219651	0.642464	MASS::glm.nb
glyceraldehyde3.phosphatedehydrogenase	2.9708	0.0619227	0.382417	3.98976	0.0169811	0.0987989	2.52153	0.10461	0.444867	MASS::glm.nb
Glu.Leu.Phe.Valdehydrogenasedimerizationdomain	3.16727	0.461314	0.834813	1.76201	0.717165	0.93195	0.385611	0.54044	0.881156	MASS::glm.nb
phosphorylaseglycogen.starch.alpha.glucanfamily	3.24945	0.0358748	0.362711	2.52514	0.0959553	0.277067	3.06901	0.0387872	0.248238	MASS::glm.nb
aspartyl.tRNAsynthetase	3.45583	0.453074	0.834813	0.836318	0.918523	0.99994	3.31273	0.452497	0.845542	MASS::glm.nb
aspartateammonia.lyase	3.51387	0.00139544	0.0446541	1.11811	0.753786	0.944079	0.872209	0.693219	0.904777	log nlme::gls
glyceraldehyde.3.phosphatedehydrogenase	4.15983	0.0478482	0.362711	0.57065	0.438473	0.743371	0.451089	0.262761	0.684299	MASS::glm.nb
aldose1.epimerase	4.24228	0.00507795	0.116499	6.99951	0.000261111	0.00417777	3.18353	0.0202644	0.196271	log nlme::gls
X13.beta.galactosyl.N.acetylhexosaminephosphorylase	4.27466	0.319528	0.757399	50.5681	0.00623659	0.04499	28.6293	0.0174431	0.188066	MASS::glm.nb
glucuronateisomerase	4.60025	0.257561	0.748066	0.242854	0.350187	0.66284	1.67937	0.696254	0.904777	MASS::glm.nb
putativeS.layer.likedomainprotein	4.89419	0.248406	0.748066	3.75619	0.334577	0.643998	1.22975	0.879002	0.974509	MASS::glm.nb
NLPAlipoprotein	5.45427	0.222044	0.720228	1.64531	0.721453	0.932787	0.766374	0.847684	0.964476	MASS::glm.nb
phosphateABCtransportersubstratebinding	5.55323	0.00546088	0.116499	2.92812	0.081556	0.25507	5.18953	0.00618813	0.113154	MASS::glm.nb
ribosomalproteinL2	5.82828	0.0220113	0.331465	5.36755	0.0277065	0.139076	3.75164	0.0789342	0.404143	MASS::glm.nb
uronateisomerase	7.36544	0.149621	0.582536	9.76461	0.0954234	0.277067	2.15551	0.578067	0.88816	MASS::glm.nb
aspartateaminotransferase	8.974	0.03901	0.362711	23.1086	0.00237597	0.0207855	5.71488	0.0950313	0.444211	MASS::glm.nb
argininedeiminase	10.9578	0.0709816	0.382417	1.87418	0.647411	0.89596	3.98762	0.291461	0.710147	MASS::glm.nb

## Sheet: suppltable5_birth_MG
taxon	ControlSection_estimate_FoldChange	ControlSection_p	ControlSection_p_FDR	ProbioticSection_estimate_FoldChange	ProbioticSection_p	ProbioticSection_p_FDR	model				Mean_ControlSection	Mean_ControlVaginal	Mean_ProbioticSection	FoldChange_ControlSection	FoldChange_ProbioticSection
HEME.BIOSYNTHESIS.II..heme.biosynthesis.I..aerobic.	1.01746e-12	0.999831	0.999833	3.75981	0.191481	0.409444	MASS::glm.nb				0	8.95957e-06	3.38091e-05	0	3.77351
PWY.5138..unsaturated..even.numbered.fatty.acid..beta..oxidation	1.4434e-12	0.999833	0.999833	2.47889	0.221682	0.428442	MASS::glm.nb				0	6.27606e-06	1.58146e-05	0	2.51983
FAO.PWY..fatty.acid..beta..oxidation.I	2.42606e-12	0.99973	0.999833	2.11403	0.366992	0.530687	MASS::glm.nb				0	1.01766e-05	2.17533e-05	0	2.13759
PWY.5918..superpathay.of.heme.biosynthesis.from.glutamate	4.72455e-12	0.999565	0.999833	4.11873	0.174427	0.400163	MASS::glm.nb				0	1.42589e-05	5.87479e-05	0	4.12007
PWY.7664..oleate.biosynthesis.IV..anaerobic.	1.64002e-11	0.998145	0.999833	1.94078	0.522527	0.642946	MASS::glm.nb				0	8.22786e-05	0.000159759	0	1.94169
GLUCARDEG.PWY..D.glucarate.degradation.I	3.4986e-11	0.998202	0.999833	1.67368	0.653819	0.75631	MASS::glm.nb				0	3.85496e-05	6.46472e-05	0	1.67699
GALACTARDEG.PWY..D.galactarate.degradation.I	5.3993e-11	0.998234	0.999833	1.13026	0.900692	0.942912	MASS::glm.nb				0	2.49605e-05	2.83156e-05	0	1.13442
GLUCARGALACTSUPER.PWY..superpathway.of.D.glucarate.and.D.galactarate.degradation	5.3993e-11	0.998234	0.999833	1.13026	0.900692	0.942912	MASS::glm.nb				0	2.49605e-05	2.83156e-05	0	1.13442
HSERMETANA.PWY..L.methionine.biosynthesis.III	1.04309e-10	0.998283	0.999833	2.2675	0.459393	0.59191	MASS::glm.nb				0	1.2908e-05	2.93144e-05	0	2.27102
PWY.5345..superpathway.of.L.methionine.biosynthesis..by.sulfhydrylation.	2.63353e-09	0.989098	0.999833	1.06021	0.537635	0.654937	MASS::glm.nb				0	2.53525e-05	3.10521e-05	0	1.22482
PWY.5022..4.aminobutanoate.degradation.V	5.66401e-09	0.982723	0.999833	0.670344	2.8335e-05	0.000273453	MASS::glm.nb				0	2.75065e-05	3.45491e-05	0	1.25603
PWY.7013..L.1.2.propanediol.degradation	5.92001e-09	0.971585	0.999833	1.11129	0.0413591	0.197933	MASS::glm.nb				0	7.69652e-05	8.82692e-05	0	1.14687
PWY.6901..superpathway.of.glucose.and.xylose.degradation	5.92836e-09	0.971587	0.999833	1.94221	9.07411e-47	2.27987e-45	MASS::glm.nb				0	8.12626e-05	0.000161068	0	1.98207
PENTOSE.P.PWY..pentose.phosphate.pathway	6.91317e-09	0.971817	0.999833	1.59049	3.083e-19	3.87302e-18	MASS::glm.nb				0	7.18849e-05	0.000110552	0	1.5379
PWY.5103..L.isoleucine.biosynthesis.III	1.09755e-08	0.954693	0.999833	1.22385	1.33212e-06	1.48753e-05	MASS::glm.nb				0	0.000119804	0.000151194	0	1.26201
PWY0.1277..3.phenylpropanoate.and.3..3.hydroxyphenyl.propanoate.degradation	0.0149184	0.00252125	0.0149051	1.03716	0.969358	0.985453	MASS::glm.nb				0	5.97953e-05	6.23162e-05	0	1.04216
PWY0.1297..superpathway.of.purine.deoxyribonucleosides.degradation	0.0168049	0.00127186	0.00798885	0.936283	0.970185	0.985453	log nlme::gls				0	0.000114959	0.000202229	0	1.75914
HCAMHPDEG.PWY..3.phenylpropanoate.and.3..3.hydroxyphenyl.propanoate.degradation.to.2.oxopent.4.enoate	0.0230027	0.00553152	0.0295012	1.16805	0.866045	0.921032	MASS::glm.nb				0	3.83993e-05	4.52747e-05	0	1.17905
PWY.6690..cinnamate.and.3.hydroxycinnamate.degradation.to.2.oxopent.4.enoate	0.0230027	0.00553152	0.0295012	1.16805	0.866045	0.921032	MASS::glm.nb				0	3.83993e-05	4.52747e-05	0	1.17905
X1CMET2.PWY..N10.formyl.tetrahydrofolate.biosynthesis	0.0295218	2.38525e-05	0.00020845	1.42656	0.556415	0.66571	MASS::glm.nb				3.78491e-06	0.000136964	0.000195715	0.0276344	1.42895
TRNA.CHARGING.PWY..tRNA.charging	0.0295489	3.55851e-23	5.502e-22	1.09602	0.049853	0.208411	MASS::glm.nb				2.52328e-06	0.000110234	0.000162497	0.0228901	1.47411
HISDEG.PWY..L.histidine.degradation.I	0.0309053	0.0153558	0.0670983	0.715058	0.724096	0.790997	MASS::glm.nb				6.30819e-07	2.28937e-05	1.64158e-05	0.0275542	0.717041
MET.SAM.PWY..superpathway.of.S.adenosyl.L.methionine.biosynthesis	0.0572473	7.84544e-05	0.000630774	1.45955	0.484622	0.612635	MASS::glm.nb				7.56983e-06	0.000138442	0.000202291	0.0546785	1.46119
PWY0.1298..superpathway.of.pyrimidine.deoxyribonucleosides.degradation	0.0759955	0.0255418	0.098729	5.01021	0.0264526	0.136332	MASS::glm.nb				0	1.09477e-05	5.83401e-05	0	5.32899
PWY0.781..aspartate.superpathway	0.0965202	0.000317898	0.0024576	1.37143	0.524593	0.642946	MASS::glm.nb				1.54551e-05	0.000164804	0.000226294	0.0937785	1.37311
ARGSYNBSUB.PWY..L.arginine.biosynthesis.II..acetyl.cycle.	0.103253	6.50782e-33	1.63509e-31	0.750413	0.0451204	0.199333	MASS::glm.nb				0.000127898	0.00124331	0.000932977	0.102869	0.750399
GLYCOLYSIS..glycolysis.I..from.glucose.6.phosphate.	0.116116	4.79431e-31	1.07073e-29	1.17008	0.000859487	0.00616989	MASS::glm.nb				1.86754e-05	9.28729e-05	0.00012248	0.201086	1.31879
PWY.5484..glycolysis.II..from.fructose.6.phosphate.	0.125106	5.66901e-29	1.03588e-27	1.21293	6.93359e-05	0.000633478	MASS::glm.nb				1.86754e-05	8.66633e-05	0.000118445	0.215494	1.36672
ANAEROFRUCAT.PWY..homolactic.fermentation	0.130985	1.27367e-41	4.26681e-40	1.07932	0.0639281	0.247107	MASS::glm.nb				2.86357e-05	0.000132106	0.000155022	0.216763	1.17347
PWY.1269..CMP.3.deoxy.D.manno.octulosonate.biosynthesis.I	0.134083	0.0465276	0.170037	2.33647	0.276	0.464006	MASS::glm.nb				9.10535e-06	6.8332e-05	0.000159889	0.133252	2.33989
PWY.621..sucrose.degradation.III..sucrose.invertase.	0.153434	0.0139363	0.0636637	1.82266	0.316138	0.492587	MASS::glm.nb				5.8948e-05	0.000382556	0.000697333	0.15409	1.82283
GLUTORN.PWY..L.ornithine.biosynthesis	0.185372	0.00591877	0.0297418	1.19323	0.712599	0.786991	MASS::glm.nb				5.85082e-05	0.000314919	0.000376065	0.185788	1.19416
PWY0.845..superpathway.of.pyridoxal.5..phosphate.biosynthesis.and.salvage	0.204616	0.151222	0.434224	2.30981	0.332043	0.51339	MASS::glm.nb				1.3878e-05	6.85396e-05	0.000158595	0.202482	2.31392
PYRIDOXSYN.PWY..pyridoxal.5..phosphate.biosynthesis.I	0.236424	0.168247	0.463255	2.4194	0.277019	0.464006	MASS::glm.nb				1.07239e-05	4.60315e-05	0.000111691	0.232969	2.42641
PWY.5686..UMP.biosynthesis	0.240831	0.000413475	0.00307809	0.870635	0.66131	0.759562	MASS::glm.nb				0.000144731	0.000603886	0.000526139	0.239666	0.871255
PWY.6126..superpathway.of.adenosine.nucleotides.de.novo.biosynthesis.II	0.243774	0.634583	0.931985	1.92957	0.179307	0.400163	log nlme::gls				0.000191454	9.41206e-05	0.000210344	2.03413	2.23483
PWY.7282..4.amino.2.methyl.5.phosphomethylpyrimidine.biosynthesis..yeast.	0.250566	0.113156	0.349915	1.41153	0.614933	0.718613	MASS::glm.nb				3.24872e-05	0.000130587	0.000184659	0.248778	1.41407
GLYCOLYSIS.E.D..superpathway.of.glycolysis.and.Entner.Doudoroff	0.251119	0.190221	0.483981	1.39208	0.689209	0.777023	MASS::glm.nb				2.11655e-05	8.6434e-05	0.000120857	0.244875	1.39825
PWY.6125..superpathway.of.guanosine.nucleotides.de.novo.biosynthesis.II	0.263915	0.647408	0.931985	1.97936	0.18456	0.400163	log nlme::gls				0.000171898	8.20746e-05	0.000192898	2.09441	2.35028
ILEUSYN.PWY..L.isoleucine.biosynthesis.I..from.threonine.	0.277571	1.5964e-06	1.60438e-05	0.767854	0.208119	0.418319	MASS::glm.nb				0.0003967	0.00142598	0.00109479	0.278195	0.767744
VALSYN.PWY..L.valine.biosynthesis	0.277571	1.5964e-06	1.60438e-05	0.767854	0.208119	0.418319	MASS::glm.nb				0.0003967	0.00142598	0.00109479	0.278195	0.767744
DAPLYSINESYN.PWY..L.lysine.biosynthesis.I	0.287588	0.00566493	0.0295012	1.02423	0.945756	0.979881	MASS::glm.nb				7.51503e-05	0.000262892	0.000269791	0.28586	1.02624
CITRULBIO.PWY..L.citrulline.biosynthesis	0.287885	0.299899	0.677301	1.73976	0.545253	0.656262	MASS::glm.nb				2.83868e-06	1.26388e-05	2.29617e-05	0.224602	1.81677
NONMEVIPP.PWY..methylerythritol.phosphate.pathway.I	0.294533	0.311925	0.688977	0.378876	0.000241852	0.00211358	log nlme::gls				0.000569983	0.00113147	0.000441516	0.503756	0.390216
UDPNAGSYN.PWY..UDP.N.acetyl.D.glucosamine.biosynthesis.I	0.305642	0.000814031	0.00545401	0.580551	0.051065	0.208411	MASS::glm.nb				0.000284423	0.000928554	0.00053941	0.306308	0.580914
PWY.7400..L.arginine.biosynthesis.IV..archaebacteria.	0.311512	0.0491785	0.175853	1.01123	0.970745	0.985453	nlme::gls				0.000235394	0.000757844	0.000766487	0.31061	1.0114
ARGSYN.PWY..L.arginine.biosynthesis.I..via.L.ornithine.	0.314454	0.0498689	0.175853	1.03663	0.907796	0.945425	nlme::gls				0.000223326	0.000712368	0.000738613	0.313497	1.03684
PWY.7111..pyruvate.fermentation.to.isobutanol..engineered.	0.31986	5.3962e-06	5.16493e-05	0.686372	0.0556678	0.219397	MASS::glm.nb				0.000342176	0.00106906	0.000734325	0.320071	0.686886
COA.PWY..coenzyme.A.biosynthesis.I	0.325373	0.111104	0.349915	2.36901	0.117654	0.387035	MASS::glm.nb				3.80898e-05	0.00011785	0.000279599	0.323206	2.3725
COA.PWY.1..coenzyme.A.biosynthesis.II..mammalian.	0.349252	0.136077	0.396398	2.0191	0.205299	0.418319	MASS::glm.nb				6.86596e-05	0.000197423	0.000398942	0.347778	2.02074
PWY.6703..preQ0.biosynthesis	0.350727	0.228573	0.560584	0.984933	0.982287	0.992159	MASS::glm.nb				3.73427e-05	0.000106554	0.00010508	0.350458	0.986162
THISYNARA.PWY..superpathway.of.thiamin.diphosphate.biosynthesis.III..eukaryotes.	0.353743	0.333608	0.713352	0.991531	0.991974	0.996934	MASS::glm.nb				2.99637e-05	8.43239e-05	8.38918e-05	0.355341	0.994876
THISYN.PWY..superpathway.of.thiamin.diphosphate.biosynthesis.I	0.366465	0.483975	0.879338	2.4957	0.418379	0.568527	MASS::glm.nb				2.96153e-05	8.10155e-05	0.00020229	0.365551	2.49693
BRANCHED.CHAIN.AA.SYN.PWY..superpathway.of.branched.amino.acid.biosynthesis	0.370475	9.85925e-06	9.00777e-05	0.97804	0.89954	0.942912	MASS::glm.nb				0.000344949	0.000927796	0.000907893	0.371793	0.978548
PWY.6147..6.hydroxymethyl.dihydropterin.diphosphate.biosynthesis.I	0.381453	0.382731	0.78499	2.50066	0.286842	0.476489	MASS::glm.nb				1.04085e-05	2.93629e-05	7.48882e-05	0.354479	2.55044
PWY.7204..pyridoxal.5..phosphate.salvage.II..plants.	0.38481	0.26928	0.61506	3.82433	0.0451263	0.199333	MASS::glm.nb				1.32472e-05	3.49999e-05	0.000134461	0.378493	3.84175
PWY.7220..adenosine.deoxyribonucleotides.de.novo.biosynthesis.II	0.386784	0.717744	0.942919	2.02708	0.166868	0.400163	log nlme::gls				9.99848e-05	4.24755e-05	0.000101932	2.35394	2.3998
PWY.7222..guanosine.deoxyribonucleotides.de.novo.biosynthesis.II	0.386784	0.717744	0.942919	2.02708	0.166868	0.400163	log nlme::gls				9.99848e-05	4.24755e-05	0.000101932	2.35394	2.3998
HEXITOLDEGSUPER.PWY..superpathway.of.hexitol.degradation..bacteria.	0.41191	1.82292e-07	2.15534e-06	3.18961	3.9334e-70	1.31769e-68	MASS::glm.nb				2.42781e-05	4.01493e-05	0.000121303	0.604694	3.02129
PWY.6612..superpathway.of.tetrahydrofolate.biosynthesis	0.416099	0.462578	0.86091	2.5722	0.312365	0.49051	MASS::glm.nb				1.41934e-05	3.58524e-05	9.38873e-05	0.395885	2.61872
PWY.6387..UDP.N.acetylmuramoyl.pentapeptide.biosynthesis.I..meso.diaminopimelate.containing.	0.418891	0.129391	0.382465	0.883861	0.785031	0.852926	MASS::glm.nb				0.000205929	0.000492587	0.000435659	0.418056	0.884432
FOLSYN.PWY..superpathway.of.tetrahydrofolate.biosynthesis.and.salvage	0.429503	0.485604	0.879338	2.34054	0.371853	0.533874	MASS::glm.nb				2.01862e-05	4.86638e-05	0.000115344	0.41481	2.37022
OANTIGEN.PWY..O.antigen.building.blocks.biosynthesis..E..coli.	0.430439	2.54374e-34	7.30417e-33	0.555132	5.5847e-50	1.60361e-48	MASS::glm.nb				0.000120212	0.000238252	0.000157024	0.504557	0.659065
GLYCOLYSIS.TCA.GLYOX.BYPASS..superpathway.of.glycolysis..pyruvate.dehydrogenase..TCA..and.glyoxylate.bypass	0.431805	0.455998	0.86091	3.76367	0.132899	0.388524	MASS::glm.nb				1.55629e-05	3.70595e-05	0.000141781	0.419943	3.82575
PEPTIDOGLYCANSYN.PWY..peptidoglycan.biosynthesis.I..meso.diaminopimelate.containing.	0.433592	0.119163	0.362156	0.845696	0.691976	0.777023	MASS::glm.nb				0.000233917	0.000540544	0.000457426	0.432745	0.846233
PWY.5861..superpathway.of.demethylmenaquinol.8.biosynthesis	0.436479	0.376321	0.78499	2.11567	0.309875	0.49051	MASS::glm.nb				5.50804e-05	0.000126553	0.000267793	0.435235	2.11605
HISTSYN.PWY..L.histidine.biosynthesis	0.446581	0.187049	0.483785	0.904761	0.835569	0.898125	MASS::glm.nb				0.000223086	0.00050024	0.000452909	0.445957	0.905383
PWY.6385..peptidoglycan.biosynthesis.III..mycobacteria.	0.494764	0.185772	0.483785	1.00114	0.99784	0.99784	MASS::glm.nb				0.000189536	0.000384016	0.000384727	0.493563	1.00185
PWY.6892..thiazole.biosynthesis.I..E..coli.	0.522085	0.643481	0.931985	2.05502	0.515749	0.63991	MASS::glm.nb				5.40096e-05	0.000103498	0.000212724	0.52184	2.05534
NAGLIPASYN.PWY..lipid.IVA.biosynthesis	0.535454	0.458541	0.86091	2.33419	0.199683	0.418319	MASS::glm.nb				3.21718e-05	6.05324e-05	0.000141602	0.53148	2.33927
P4.PWY..superpathway.of.L.lysine..L.threonine.and.L.methionine.biosynthesis.I	0.551175	0.120719	0.362156	1.4355	0.228638	0.429497	MASS::glm.nb				0.000101537	0.000185234	0.000266459	0.548154	1.4385
PYRIDNUCSYN.PWY..NAD.biosynthesis.I..from.aspartate.	0.554833	0.454124	0.86091	1.39075	0.595175	0.699591	MASS::glm.nb				0.00011197	0.000203066	0.000282853	0.551399	1.39291
KDO.NAGLIPASYN.PWY..superpathway.of..Kdo.2.lipid.A.biosynthesis	0.591639	0.639944	0.931985	2.73658	0.253759	0.439702	MASS::glm.nb				2.55482e-05	4.34457e-05	0.000118898	0.588049	2.7367
PWY.3001..superpathway.of.L.isoleucine.biosynthesis.I	0.596385	0.00572412	0.0295012	0.836707	0.224617	0.429497	MASS::glm.nb				0.000441978	0.000738244	0.000618527	0.598689	0.837836
PWY.5659..GDP.mannose.biosynthesis	0.622135	0.728978	0.951458	2.99879	0.0175949	0.0955833	log nlme::gls				3.6878e-05	2.96365e-05	0.000106622	1.24434	3.59765
PWY.6897..thiamin.salvage.II	0.627533	0.584718	0.931985	1.56997	0.502269	0.627057	MASS::glm.nb				8.07116e-05	0.000128931	0.000202697	0.626005	1.57213
PWY0.1586..peptidoglycan.maturation..meso.diaminopimelate.containing.	0.644851	0.366624	0.7757	1.95081	0.0805237	0.299727	MASS::glm.nb				0.000144159	0.000224378	0.000437781	0.642481	1.95109
PWY.5838..superpathway.of.menaquinol.8.biosynthesis.I	0.645308	0.615035	0.931985	2.71411	0.145521	0.398234	MASS::glm.nb				6.07079e-05	9.42786e-05	0.000256098	0.643921	2.7164
SO4ASSIM.PWY..sulfate.reduction.I..assimilatory.	0.649391	0.554867	0.924335	1.3919	0.565903	0.673056	MASS::glm.nb				7.62793e-05	0.000117883	0.000164198	0.647077	1.39289
PWY.5897..superpathway.of.menaquinol.11.biosynthesis	0.683503	0.658417	0.931985	2.88683	0.117886	0.387035	MASS::glm.nb				6.41442e-05	9.40223e-05	0.00027165	0.682223	2.88921
PWY.5898..superpathway.of.menaquinol.12.biosynthesis	0.683503	0.658417	0.931985	2.88683	0.117886	0.387035	MASS::glm.nb				6.41442e-05	9.40223e-05	0.00027165	0.682223	2.88921
PWY.5899..superpathway.of.menaquinol.13.biosynthesis	0.683503	0.658417	0.931985	2.88683	0.117886	0.387035	MASS::glm.nb				6.41442e-05	9.40223e-05	0.00027165	0.682223	2.88921
ARO.PWY..chorismate.biosynthesis.I	0.69081	0.0216613	0.0870784	0.635499	0.000356494	0.00289586	MASS::glm.nb				0.000737449	0.0010647	0.000677194	0.692636	0.636043
ARG.POLYAMINE.SYN..superpathway.of.arginine.and.polyamine.biosynthesis	0.692552	0.083217	0.274207	4.05564	5.31375e-45	1.18674e-43	MASS::glm.nb				8.51605e-06	1.42693e-05	5.28476e-05	0.596809	3.70359
POLYAMSYN.PWY..superpathway.of.polyamine.biosynthesis.I	0.696103	0.218889	0.549959	4.21547	1.83805e-25	2.8419e-24	MASS::glm.nb				4.41573e-06	7.36138e-06	2.80966e-05	0.599851	3.81676
COMPLETE.ARO.PWY..superpathway.of.aromatic.amino.acid.biosynthesis	0.712958	0.0300624	0.111899	0.644902	0.000360182	0.00289586	MASS::glm.nb				0.000767421	0.00107346	0.00069287	0.714905	0.645455
PWY.6123..inosine.5..phosphate.biosynthesis.I	0.736316	0.112514	0.349915	0.938585	0.67634	0.772411	MASS::glm.nb				0.000595882	0.00081096	0.000761601	0.734785	0.939134
PWY0.1319..CDP.diacylglycerol.biosynthesis.II	0.748978	0.593858	0.931985	1.54656	0.307249	0.49051	MASS::glm.nb				0.000135468	0.000181564	0.000280933	0.746119	1.54729
PWY.5667..CDP.diacylglycerol.biosynthesis.I	0.750469	0.597118	0.931985	1.54504	0.309292	0.49051	MASS::glm.nb				0.000135468	0.000181199	0.000280097	0.747622	1.5458
PHOSLIPSYN.PWY..superpathway.of.phospholipid.biosynthesis.I..bacteria.	0.754302	0.605823	0.931985	1.49896	0.347292	0.521349	MASS::glm.nb				0.000149628	0.000199012	0.000298486	0.751857	1.49984
PWY.5188..tetrapyrrole.biosynthesis.I..from.glutamate.	0.760988	0.620239	0.931985	2.37565	0.0456186	0.199333	MASS::glm.nb				7.79973e-05	0.000102981	0.000244922	0.757397	2.37833
TCA..TCA.cycle.I..prokaryotic.	0.774311	8.33718e-07	9.30985e-06	1.34222	1.62807e-22	2.33744e-21	MASS::glm.nb				0.000151845	0.000225076	0.000306285	0.674638	1.36081
PANTOSYN.PWY..pantothenate.and.coenzyme.A.biosynthesis.I	0.77849	0.524602	0.894298	3.6181	2.59186e-05	0.000273453	MASS::glm.nb				6.32229e-05	8.20757e-05	0.000297582	0.7703	3.62571
PWY.6163..chorismate.biosynthesis.from.3.dehydroquinate	0.78615	0.174258	0.46701	0.618772	0.000598022	0.00445194	MASS::glm.nb				0.000753211	0.000956196	0.000592147	0.787716	0.619274
THRESYN.PWY..superpathway.of.L.threonine.biosynthesis	0.805686	0.329504	0.712153	0.816339	0.245391	0.438761	MASS::glm.nb				0.000484774	0.000600289	0.000490882	0.807568	0.817742
PWY4FS.7..phosphatidylglycerol.biosynthesis.I..plastidic.	0.811836	0.770674	0.979449	1.52003	0.458091	0.59191	MASS::glm.nb				0.000135784	0.0001676	0.000254826	0.810167	1.52045
PWY4FS.8..phosphatidylglycerol.biosynthesis.II..non.plastidic.	0.812716	0.771988	0.979449	1.51883	0.459254	0.59191	MASS::glm.nb				0.000135784	0.000167417	0.000254349	0.81105	1.51925
PWY.6305..putrescine.biosynthesis.IV	0.829218	0.779661	0.979449	1.65129	0.341423	0.519894	MASS::glm.nb				7.65365e-05	9.26222e-05	0.000153038	0.82633	1.65228
SULFATE.CYS.PWY..superpathway.of.sulfate.assimilation.and.cysteine.biosynthesis	0.882616	0.840369	0.999833	1.85239	0.206744	0.418319	MASS::glm.nb				9.23153e-05	0.000105043	0.000194726	0.878838	1.85379
PWY.5695..urate.biosynthesis.inosine.5..phosphate.degradation	0.900268	0.917854	0.999833	1.91211	0.42052	0.568527	MASS::glm.nb				0.000164851	0.000183316	0.000350531	0.899271	1.91217
PWY.3841..folate.transformations.II	0.902551	0.640067	0.931985	0.768842	0.128954	0.388524	MASS::glm.nb				0.000621123	0.000688707	0.000530904	0.901868	0.770871
ANAGLYCOLYSIS.PWY..glycolysis.III..from.glucose.	0.909299	0.605715	0.931985	1.18103	0.251032	0.438761	MASS::glm.nb				0.000582792	0.000642292	0.000759186	0.907364	1.182
PWY.6122..5.aminoimidazole.ribonucleotide.biosynthesis.II	0.910994	0.690912	0.942919	0.621017	0.0101684	0.0567736	MASS::glm.nb				0.00101423	0.00111236	0.000690405	0.911777	0.620665
PWY.6277..superpathway.of.5.aminoimidazole.ribonucleotide.biosynthesis	0.910994	0.690912	0.942919	0.621017	0.0101684	0.0567736	MASS::glm.nb				0.00101423	0.00111236	0.000690405	0.911777	0.620665
PWY.6969..TCA.cycle.V..2.oxoglutarate.ferredoxin.oxidoreductase.	0.911681	0.102419	0.332035	1.55081	5.60549e-38	1.02428e-36	MASS::glm.nb				0.000131385	0.000165115	0.000262312	0.795715	1.58866
PWY0.166..superpathway.of.pyrimidine.deoxyribonucleotides.de.novo.biosynthesis..E..coli.	0.923241	0.870352	0.999833	1.1494	0.718567	0.789246	MASS::glm.nb				0.000289205	0.000313633	0.000361094	0.922112	1.15132
PWY.7315..dTDP.N.acetylthomosamine.biosynthesis	0.925219	0.949267	0.999833	1.47831	0.685403	0.777023	MASS::glm.nb				8.82979e-05	9.54852e-05	0.000141177	0.924729	1.47853
PWY.6803..phosphatidylcholine.acyl.editing	0.96148	0.956106	0.999833	1.67836	0.357733	0.524849	MASS::glm.nb				0.000108036	0.000112617	0.000189106	0.959322	1.6792
PWY0.1338..polymyxin.resistance	0.96857	0.978243	0.999833	2.00337	0.451735	0.59191	MASS::glm.nb				3.59152e-05	3.7188e-05	7.45478e-05	0.965773	2.00462
PPGPPMET.PWY..ppGpp.biosynthesis	0.97163	0.963704	0.999833	1.2072	0.705993	0.784004	MASS::glm.nb				0.000125632	0.000129654	0.000156622	0.96898	1.208
PWY.6823..molybdenum.cofactor.biosynthesis	0.978229	0.987074	0.999833	2.14497	0.476566	0.606265	MASS::glm.nb				3.78159e-05	3.87319e-05	8.31387e-05	0.97635	2.14652
SER.GLYSYN.PWY..superpathway.of.L.serine.and.glycine.biosynthesis.I	1.02891	0.956856	0.999833	1.73438	0.184622	0.400163	MASS::glm.nb				0.000114128	0.000111246	0.000193269	1.02591	1.73731
GLYCOCAT.PWY..glycogen.degradation.I..bacterial.	1.05728	0.94864	0.999833	10.2969	0.000539745	0.00417264	MASS::glm.nb				1.59115e-05	1.50656e-05	0.000161773	1.05615	10.7379
GLUCOSE1PMETAB.PWY..glucose.and.glucose.1.phosphate.degradation	1.06233	0.938311	0.999833	1.68517	0.397795	0.555256	MASS::glm.nb				0.000207597	0.000195671	0.000329712	1.06095	1.68503
PWY.6519..8.amino.7.oxononanoate.biosynthesis.I	1.07404	0.920223	0.999833	1.9109	0.249909	0.438761	MASS::glm.nb				0.000124097	0.000115756	0.00022131	1.07206	1.91187
AST.PWY..L.arginine.degradation.II..AST.pathway.	1.09583	0.937844	0.999833	1.88035	0.495156	0.622039	MASS::glm.nb				3.59068e-05	3.28626e-05	6.17746e-05	1.09263	1.87978
PWY.6121..5.aminoimidazole.ribonucleotide.biosynthesis.I	1.09888	0.750995	0.973871	0.755401	0.232535	0.429638	MASS::glm.nb				0.000876178	0.000796222	0.000601481	1.10042	0.755419
TCA.GLYOX.BYPASS..superpathway.of.glyoxylate.bypass.and.TCA	1.10388	0.924088	0.999833	1.93226	0.421446	0.568527	MASS::glm.nb				0.000135767	0.00012312	0.000237884	1.10272	1.93212
P105.PWY..TCA.cycle.IV..2.oxoglutarate.decarboxylase.	1.13596	0.901202	0.999833	2.1687	0.339898	0.519894	MASS::glm.nb				0.000131385	0.000115786	0.000251103	1.13472	2.16868
NAD.BIOSYNTHESIS.II..NAD.salvage.pathway.II	1.14303	0.856064	0.999833	1.60909	0.413861	0.568527	MASS::glm.nb				0.000187976	0.000164711	0.000264942	1.14124	1.60853
UNINTEGRATED	1.14447	0.527685	0.894298	1.25869	0.173174	0.400163	MASS::glm.nb				0.922842	0.806352	1.01495	1.14446	1.2587
BIOTIN.BIOSYNTHESIS.PWY..biotin.biosynthesis.I	1.14697	0.842731	0.999833	2.18603	0.151496	0.400163	MASS::glm.nb				0.000117482	0.000102661	0.000224539	1.14437	2.18719
GLYOXYLATE.BYPASS..glyoxylate.cycle	1.14963	0.894996	0.999833	2.18494	0.348897	0.521349	MASS::glm.nb				0.000104284	9.08329e-05	0.000198451	1.14809	2.18479
PWY0.1261..anhydromuropeptides.recycling	1.16885	0.801472	0.994419	1.51597	0.396016	0.555256	MASS::glm.nb				0.000281577	0.000240896	0.000365453	1.16887	1.51706
PWY.7357..thiamin.formation.from.pyrithiamine.and.oxythiamine..yeast.	1.18247	0.81109	0.999833	1.53659	0.438128	0.579366	MASS::glm.nb				0.000263508	0.000222885	0.00034267	1.18226	1.53743
PWY0.1061..superpathway.of.L.alanine.biosynthesis	1.19461	0.836378	0.999833	1.85668	0.362969	0.528673	MASS::glm.nb				0.000192416	0.000161197	0.000299272	1.19367	1.85655
PYRIDNUCSAL.PWY..NAD.salvage.pathway.I	1.20193	0.901128	0.999833	1.31959	0.812027	0.877513	MASS::glm.nb				7.25442e-06	6.14471e-06	8.01155e-06	1.1806	1.30381
HOMOSER.METSYN.PWY..L.methionine.biosynthesis.I	1.20546	0.7054	0.942919	1.82771	0.12169	0.38825	MASS::glm.nb				0.000132364	0.000110106	0.000201301	1.20215	1.82825
PWY.7221..guanosine.ribonucleotides.de.novo.biosynthesis	1.22742	0.667415	0.938115	1.74134	0.140859	0.396315	MASS::glm.nb				0.000408812	0.000333257	0.000581019	1.22672	1.74346
KETOGLUCONMET.PWY..ketogluconate.metabolism	1.22756	0.855939	0.999833	1.99884	0.437715	0.579366	MASS::glm.nb				0.000166602	0.000135841	0.000271468	1.22645	1.99843
PWY.7219..adenosine.ribonucleotides.de.novo.biosynthesis	1.24601	0.414204	0.816226	0.987045	0.951171	0.980438	MASS::glm.nb				0.00139571	0.00111924	0.00110557	1.24701	0.98778
FASYN.ELONG.PWY..fatty.acid.elongation....saturated	1.24904	0.71725	0.942919	1.90141	0.18503	0.400163	MASS::glm.nb				0.000183186	0.000146849	0.000279349	1.24745	1.90229
PWY.7663..gondoate.biosynthesis..anaerobic.	1.24904	0.71725	0.942919	1.90141	0.18503	0.400163	MASS::glm.nb				0.000183186	0.000146849	0.000279349	1.24745	1.90229
PWY0.1241..ADP.L.glycero..beta..D.manno.heptose.biosynthesis	1.25264	0.817701	0.999833	2.35519	0.266796	0.45581	MASS::glm.nb				7.6246e-05	6.10044e-05	0.000143686	1.24985	2.35533
METSYN.PWY..L.homoserine.and.L.methionine.biosynthesis	1.26543	0.584905	0.931985	1.66888	0.13202	0.388524	MASS::glm.nb				0.00020988	0.000166161	0.000277476	1.26311	1.66992
PWY.724..superpathway.of.L.lysine..L.threonine.and.L.methionine.biosynthesis.II	1.28413	0.637395	0.931985	1.17417	0.701813	0.783692	MASS::glm.nb				0.000442052	0.000343625	0.000403792	1.28644	1.1751
PWY.5347..superpathway.of.L.methionine.biosynthesis..transsulfuration.	1.28624	0.55644	0.924335	1.61244	0.157283	0.400163	MASS::glm.nb				0.000232514	0.000181061	0.000292132	1.28418	1.61344
GLCMANNANAUT.PWY..superpathway.of.N.acetylglucosamine..N.acetylmannosamine.and.N.acetylneuraminate.degradation	1.29912	0.83346	0.999833	1.82476	0.540905	0.654952	MASS::glm.nb				0.000200866	0.000154692	0.000282243	1.29849	1.82455
PWY.6737..starch.degradation.V	1.32247	0.640032	0.931985	0.662814	0.384259	0.547774	MASS::glm.nb				0.000727571	0.000549716	0.00036459	1.32354	0.663234
SALVADEHYPOX.PWY..adenosine.nucleotides.degradation.II	1.34422	0.769867	0.979449	2.61726	0.228373	0.429497	MASS::glm.nb				0.000130198	9.69868e-05	0.000253873	1.34243	2.61761
DTDPRHAMSYN.PWY..dTDP.L.rhamnose.biosynthesis.I	1.36336	0.777824	0.979449	0.443958	0.350159	0.521349	MASS::glm.nb				0.000254029	0.000186324	8.24789e-05	1.36337	0.442664
ENTBACSYN.PWY..enterobactin.biosynthesis	1.36401	0.798162	0.994419	1.53592	0.654716	0.75631	MASS::glm.nb				0.000255174	0.000187035	0.000287825	1.36432	1.53889
PWY.6630..superpathway.of.L.tyrosine.biosynthesis	1.3726	0.579842	0.931985	1.65044	0.26759	0.45581	MASS::glm.nb				0.000271127	0.00019763	0.000326313	1.3719	1.65113
PWY.7228..superpathway.of.guanosine.nucleotides.de.novo.biosynthesis.I	1.40914	0.512142	0.894298	2.01142	0.0908632	0.326134	MASS::glm.nb				0.000352013	0.000249922	0.000503402	1.40849	2.01423
PWY.6700..queuosine.biosynthesis	1.41026	0.467585	0.862245	1.65395	0.178149	0.400163	MASS::glm.nb				0.000220562	0.000156561	0.000259571	1.4088	1.65796
UNMAPPED	1.42328	0.067189	0.228898	1.23255	0.170211	0.400163	MASS::glm.nb				0.350959	0.246586	0.303931	1.42327	1.23256
GALACT.GLUCUROCAT.PWY..superpathway.of.hexuronide.and.hexuronate.degradation	1.43683	0.716261	0.942919	2.23231	0.308004	0.49051	MASS::glm.nb				0.00011246	7.83918e-05	0.000174926	1.43459	2.23143
GLUCUROCAT.PWY..superpathway.of..beta..D.glucuronide.and.D.glucuronate.degradation	1.46752	0.69156	0.942919	2.0301	0.353929	0.523086	MASS::glm.nb				0.00012413	8.47205e-05	0.000171896	1.46517	2.02898
PWY.7269..NAD.NADP.NADH.NADPH.mitochondrial.interconversion..yeast.	1.52111	0.685473	0.942919	1.8968	0.434153	0.579366	MASS::glm.nb				0.000208344	0.000137074	0.000259975	1.51994	1.8966
PWY.6628..superpathway.of.L.phenylalanine.biosynthesis	1.56639	0.409213	0.814374	1.97211	0.119384	0.387035	log nlme::gls				0.000287669	0.000234929	0.000349591	1.22449	1.48807
PWY.6124..inosine.5..phosphate.biosynthesis.II	1.5679	0.588019	0.931985	2.385	0.18515	0.400163	MASS::glm.nb				0.000201131	0.000128444	0.000306324	1.5659	2.38487
CALVIN.PWY..Calvin.Benson.Bassham.cycle	1.60948	0.230186	0.560584	1.61206	0.127652	0.388524	MASS::glm.nb				0.000505872	0.000313503	0.000505776	1.61361	1.6133
GALACTUROCAT.PWY..D.galacturonate.degradation.I	1.65946	0.521662	0.894298	2.34845	0.171459	0.400163	MASS::glm.nb				0.000118428	7.15183e-05	0.000167891	1.65591	2.34752
PWY.841..superpathway.of.purine.nucleotides.de.novo.biosynthesis.I	1.71644	0.49041	0.880111	2.32146	0.17372	0.400163	MASS::glm.nb				0.00031443	0.000183247	0.00042563	1.71588	2.32271
PWY.7187..pyrimidine.deoxyribonucleotides.de.novo.biosynthesis.II	1.75172	2.95293e-25	4.94616e-24	1.30126	6.16359e-10	7.28754e-09	MASS::glm.nb				0.000166852	0.000122293	0.000197389	1.36436	1.61406
POLYISOPRENSYN.PWY..polyisoprenoid.biosynthesis..E..coli.	1.77595	0.62634	0.931985	3.25731	0.205083	0.418319	MASS::glm.nb				8.59158e-05	4.84293e-05	0.000157753	1.77404	3.25739
PWY.5097..L.lysine.biosynthesis.VI	1.82329	0.311399	0.688977	1.39937	0.473834	0.606265	MASS::glm.nb				0.000513857	0.000281416	0.000394145	1.82597	1.40058
PWY.6151..S.adenosyl.L.methionine.cycle.I	1.84588	0.245701	0.587927	2.25095	0.0518435	0.208411	MASS::glm.nb				0.000400776	0.000217267	0.000488817	1.84463	2.24984
NONOXIPENT.PWY..pentose.phosphate.pathway..non.oxidative.branch.	1.88517	0.255217	0.589639	1.28469	0.569706	0.673594	MASS::glm.nb				0.000494028	0.000261598	0.000336238	1.8885	1.28532
PWY.6936..seleno.amino.acid.biosynthesis	1.95187	0.164189	0.461276	2.80629	0.00658936	0.0413894	MASS::glm.nb				0.000344368	0.00017654	0.000495301	1.95065	2.8056
PWY.4041...gamma..glutamyl.cycle	1.95915	0.255057	0.589639	1.78418	0.215188	0.421388	MASS::glm.nb				0.000271974	0.000138752	0.000247669	1.96015	1.78498
COBALSYN.PWY..adenosylcobalamin.salvage.from.cobinamide.I	1.97559	1.37591e-14	1.84372e-13	3.4155	1.57969e-87	7.93795e-86	MASS::glm.nb				7.05022e-05	4.43686e-05	0.000155733	1.58901	3.50998
GLUCONEO.PWY..gluconeogenesis.I	1.99377	6.85031e-30	1.37691e-28	2.66203	1.31565e-109	8.81486e-108	MASS::glm.nb				0.000172238	7.41777e-05	0.000206234	2.32197	2.78026
FUCCAT.PWY..fucose.degradation	2.00071	0.525048	0.894298	3.16378	0.181592	0.400163	MASS::glm.nb				0.000110916	5.55484e-05	0.00017557	1.99675	3.16067
PWY.5791..1.4.dihydroxy.2.naphthoate.biosynthesis.II..plants.	2.02232	0.43457	0.83989	2.89685	0.135307	0.388524	MASS::glm.nb				0.000140174	6.93775e-05	0.000201021	2.02046	2.8975
PWY.5837..1.4.dihydroxy.2.naphthoate.biosynthesis.I	2.02232	0.43457	0.83989	2.89685	0.135307	0.388524	MASS::glm.nb				0.000140174	6.93775e-05	0.000201021	2.02046	2.8975
PWY.6317..galactose.degradation.I..Leloir.pathway.	2.06802	0.020898	0.0857845	1.34397	0.235125	0.429638	MASS::glm.nb				0.000498528	0.000240763	0.000323941	2.07062	1.34548
RIBOSYN2.PWY..flavin.biosynthesis.I..bacteria.and.plants.	2.0986	0.52946	0.894298	3.16741	0.215935	0.421388	MASS::glm.nb				0.000180223	8.59138e-05	0.000272173	2.09772	3.16797
PWY.2942..L.lysine.biosynthesis.III	2.1402	0.165233	0.461276	1.92904	0.12962	0.388524	MASS::glm.nb				0.000588999	0.000274814	0.000530681	2.14327	1.93106
PWY.1042..glycolysis.IV..plant.cytosol.	2.14873	0.000743593	0.00515387	1.76489	0.0015411	0.0103254	MASS::glm.nb				0.000669611	0.000310686	0.000549528	2.15527	1.76876
ASPASN.PWY..superpathway.of.L.aspartate.and.L.asparagine.biosynthesis	2.16621	0.249653	0.589639	1.93433	0.213939	0.421388	MASS::glm.nb				0.000360305	0.000166447	0.000321942	2.16468	1.9342
DENOVOPURINE2.PWY..superpathway.of.purine.nucleotides.de.novo.biosynthesis.II	2.1737	1.83223e-58	7.36555e-57	1.65395	1.14005e-38	2.29151e-37	MASS::glm.nb				0.00022741	0.000134371	0.00027328	1.69241	2.03378
FUC.RHAMCAT.PWY..superpathway.of.fucose.and.rhamnose.degradation	2.22883	0.392604	0.790701	2.96866	0.141964	0.396315	MASS::glm.nb				0.000160643	7.17767e-05	0.000214694	2.23809	2.99115
COLANSYN.PWY..colanic.acid.building.blocks.biosynthesis	2.31752	7.43952e-15	1.0681e-13	4.56107	3.34515e-86	1.34475e-84	MASS::glm.nb				4.82078e-05	2.83538e-05	0.000125811	1.70022	4.4372
PWY.6507..4.deoxy.L.threo.hex.4.enopyranuronate.degradation	2.37249	0.172444	0.46701	1.53343	0.393514	0.555256	MASS::glm.nb				0.000219467	9.25668e-05	0.000141893	2.3709	1.53287
PWY0.862...5Z..dodec.5.enoate.biosynthesis	2.4259	0.37885	0.78499	2.2588	0.306104	0.49051	MASS::glm.nb				0.000218412	9.00383e-05	0.000203479	2.42577	2.25992
HEMESYN2.PWY..heme.biosynthesis.II..anaerobic.	2.45145	0.393384	0.790701	5.86482	0.0329364	0.165506	MASS::glm.nb				4.85398e-05	1.9973e-05	0.000116601	2.43028	5.83793
PANTO.PWY..phosphopantothenate.biosynthesis.I	2.52054	0.0143008	0.063877	1.69639	0.0767555	0.291092	MASS::glm.nb				0.000599383	0.000237292	0.000402715	2.52593	1.69712
PWY.7229..superpathway.of.adenosine.nucleotides.de.novo.biosynthesis.I	2.52155	2.15627e-65	1.08353e-63	1.6877	6.00292e-31	1.00549e-29	MASS::glm.nb				0.000191454	9.95237e-05	0.000204714	1.9237	2.05694
PWY0.1533..methylphosphonate.degradation.I	2.52898	0.501539	0.892118	4.61889	0.160661	0.400163	MASS::glm.nb				4.76268e-05	1.89453e-05	8.71735e-05	2.51391	4.60132
PWY66.422..D.galactose.degradation.V..Leloir.pathway.	2.70084	0.00168725	0.0102769	1.34399	0.238307	0.431528	MASS::glm.nb				0.000651667	0.000240763	0.000323941	2.70668	1.34548
PWY.7242..D.fructuronate.degradation	2.70445	0.323751	0.707326	2.50094	0.250178	0.438761	MASS::glm.nb				0.000241877	8.95013e-05	0.000223755	2.7025	2.50002
PWY.6527..stachyose.degradation	2.76172	5.78674e-05	0.000484639	1.17639	0.418282	0.568527	MASS::glm.nb				0.000631115	0.000227825	0.000268501	2.77018	1.17854
PWY.6609..adenine.and.adenosine.salvage.III	3.02185	0.000739065	0.00515387	2.35368	0.000963905	0.00668086	MASS::glm.nb				0.000638371	0.000211195	0.000497526	3.02266	2.35577
PWY.6386..UDP.N.acetylmuramoyl.pentapeptide.biosynthesis.II..lysine.containing.	3.60497	0	0	1.34458	1.28233e-20	1.71832e-19	MASS::glm.nb				0.00085713	0.000208043	0.000241512	4.11997	1.16088
P461.PWY..hexitol.fermentation.to.lactate..formate..ethanol.and.acetate	3.82261	0.0138931	0.0636637	1.67155	0.233704	0.429638	MASS::glm.nb				0.000727374	0.000190328	0.000317889	3.82169	1.67022
PWY.7199..pyrimidine.deoxyribonucleosides.salvage	3.87533	0.00266802	0.0153221	1.84047	0.0877285	0.320608	MASS::glm.nb				0.000530352	0.000136817	0.000252305	3.87634	1.8441
RHAMCAT.PWY..L.rhamnose.degradation.I	3.88204	0.0159052	0.0680203	1.90851	0.146613	0.398234	MASS::glm.nb				0.000565021	0.000145391	0.000277555	3.88621	1.90903
PWY0.1296..purine.ribonucleosides.degradation	5.30542	1.39991e-10	1.75864e-09	2.37346	2.85697e-05	0.000273453	MASS::glm.nb				0.000943029	0.000177485	0.00042203	5.3133	2.37784
PWY.5384..sucrose.degradation.IV..sucrose.phosphorylase.	5.87982	0.187737	0.483785	8.26964	0.0470199	0.201085	MASS::glm.nb				0.000120354	2.05762e-05	0.00016943	5.84915	8.23427
GLYCOGENSYNTH.PWY..glycogen.biosynthesis.I..from.ADP.D.Glucose.	6.26291	0.0289883	0.109937	4.72475	0.0196068	0.10371	MASS::glm.nb				0.000166934	2.61183e-05	0.00012627	6.39147	4.83454
PWY.5971..palmitate.biosynthesis.II..bacteria.and.plants.	6.57413	0.0791554	0.265171	9.34096	0.00845454	0.0499812	MASS::glm.nb				0.000191985	2.84351e-05	0.000273571	6.75168	9.62091
PWY.5973..cis.vaccenate.biosynthesis	7.08029	0.231485	0.560584	3.70352	0.311539	0.49051	MASS::glm.nb				0.00028581	4.03348e-05	0.000149549	7.08594	3.70768
PWY.2941..L.lysine.biosynthesis.II	7.89531	0.0110016	0.0526505	3.61866	0.045473	0.199333	MASS::glm.nb				0.000732105	9.26888e-05	0.000335653	7.89853	3.62129
PWY.7383..anaerobic.energy.metabolism..invertebrates..cytosol.	8.93167	0.0595993	0.206543	4.69962	0.0926994	0.326887	MASS::glm.nb				0.000182979	2.04886e-05	9.63787e-05	8.93078	4.70403
PWY66.399..gluconeogenesis.III	11.3391	0.0226199	0.089149	5.77528	0.0376925	0.184785	MASS::glm.nb				0.000210312	1.78379e-05	0.000107038	11.7902	6.00061
PWY.6285..superpathway.of.fatty.acids.biosynthesis..E..coli.	13.4849	3.53063e-174	3.54829e-172	12.083	7.65501e-183	1.53866e-180	MASS::glm.nb				0.000208635	1.5572e-05	0.000208232	13.3981	13.3722
PWY.6284..superpathway.of.unsaturated.fatty.acids.biosynthesis..E..coli.	14.1865	0.0209126	0.0857845	11.4959	0.00725683	0.0442007	MASS::glm.nb				0.000212071	1.41328e-05	0.000172012	15.0056	12.1711
PWY.6282..palmitoleate.biosynthesis.I..from..5Z..dodec.5.enoate.	14.4906	4.48355e-157	3.00398e-155	12.574	1.54407e-159	1.55179e-157	MASS::glm.nb				0.000187577	1.30676e-05	0.000181082	14.3544	13.8574
LACTOSECAT.PWY..lactose.and.galactose.degradation.I	23.5165	0.00110075	0.00713713	2.93601	0.159595	0.400163	MASS::glm.nb				0.00177653	7.54763e-05	0.000221744	23.5376	2.93793
PWY.5989..stearate.biosynthesis.II..bacteria.and.plants.	28.1016	0.0101604	0.0498106	24.935	0.00179036	0.0116084	MASS::glm.nb				0.000168121	5.92707e-06	0.000149262	28.365	25.1831

## Sheet: suppltable6_AB
taxon	ControlAB_estimate_FoldChange	ControlAB_p	ControlAB_p_FDR	ProbioticAB_estimate_FoldChange	ProbioticAB_p	ProbioticAB_p_FDR	ProbioticNoAB_estimate_FoldChange	ProbioticNoAB_p	ProbioticNoAB_p_FDR	model
Actinobacteria	0.254702	0.342587	0.446706	2.02197	3.48234e-05	0.000159707	1.8712	1.86209e-08	1.54786e-07	log nlme::gls
Actinobacteria_Actinobacteria	0.273459	0.00979728	0.0434346	2.30385	3.70956e-10	6.16714e-09	1.98276	5.36952e-07	2.64499e-06	log nlme::gls
Actinobacteria_Actinobacteria_Actinomycetales	0.190558	1.66105e-07	7.364e-06	0.473521	0.0663802	0.117714	0.700194	0.0329542	0.0554799	MASS::glm.nb
Actinobacteria_Actinobacteria_Actinomycetales_Actinomycetaceae	0.190558	1.66105e-07	7.364e-06	0.473521	0.0663802	0.117714	0.700194	0.0329542	0.0554799	MASS::glm.nb
Actinobacteria_Actinobacteria_Actinomycetales_Actinomycetaceae_Actinomyces	0.190558	1.66105e-07	7.364e-06	0.473521	0.0663802	0.117714	0.700194	0.0329542	0.0554799	MASS::glm.nb
Actinobacteria_Actinobacteria_Bifidobacteriales	0.239172	0.0295325	0.0892917	4.09288	9.35012e-12	2.07261e-10	3.2503	5.41434e-08	3.79004e-07	log nlme::gls
Actinobacteria_Actinobacteria_Bifidobacteriales_Bifidobacteriaceae	0.239172	0.0295325	0.0892917	4.09288	9.35012e-12	2.07261e-10	3.2503	5.41434e-08	3.79004e-07	log nlme::gls
Actinobacteria_Actinobacteria_Bifidobacteriales_Bifidobacteriaceae_Bifidobacterium	0.239189	0.0295401	0.0892917	4.09324	9.32239e-12	2.07261e-10	3.25057	5.40264e-08	3.79004e-07	log nlme::gls
Actinobacteria_Actinobacteria_Bifidobacteriales_Bifidobacteriaceae_Gardnerella	0.448263	0.224495	0.335482	0.137354	0.0472943	0.0967715	0.214813	2.17466e-05	8.2637e-05	MASS::glm.nb
Actinobacteria_Actinobacteria_Corynebacteriales	0.432753	0.0517005	0.132234	0.313094	0.0363882	0.0780585	0.241822	4.68272e-10	4.79078e-09	MASS::glm.nb
Actinobacteria_Actinobacteria_Corynebacteriales_Corynebacteriaceae	0.408091	0.0159612	0.0623902	0.617666	0.305871	0.428219	0.653697	0.0252722	0.0454217	MASS::glm.nb
Actinobacteria_Actinobacteria_Corynebacteriales_Corynebacteriaceae_Corynebacterium	0.408091	0.0159612	0.0623902	0.617666	0.305871	0.428219	0.653697	0.0252722	0.0454217	MASS::glm.nb
Actinobacteria_Actinobacteria_Corynebacteriales_Nocardiaceae	0.433356	0.110502	0.209953	0.305247	0.0789361	0.126488	0.236627	2.02339e-07	1.07644e-06	MASS::glm.nb
Actinobacteria_Actinobacteria_Corynebacteriales_Nocardiaceae_Rhodococcus	0.433356	0.110502	0.209953	0.305247	0.0789361	0.126488	0.236627	2.02339e-07	1.07644e-06	MASS::glm.nb
Actinobacteria_Actinobacteria_Micrococcales	1.17502	0.595039	0.688175	0.474383	0.0583874	0.112544	0.707885	0.03191	0.0554799	MASS::glm.nb
Actinobacteria_Actinobacteria_Micrococcales_Micrococcaceae	1.17502	0.595039	0.688175	0.474383	0.0583874	0.112544	0.707885	0.03191	0.0554799	MASS::glm.nb
Actinobacteria_Actinobacteria_Micrococcales_Micrococcaceae_Rothia	1.13939	0.68327	0.721229	0.459908	0.0613605	0.114943	0.683643	0.0250184	0.0454217	MASS::glm.nb
Actinobacteria_Coriobacteriia	0.228809	0.000154846	0.00166582	0.117196	2.00981e-05	9.54661e-05	0.549955	0.00371368	0.00823199	MASS::glm.nb
Actinobacteria_Coriobacteriia_Coriobacteriales	0.228809	0.000154846	0.00166582	0.117196	2.00981e-05	9.54661e-05	0.549955	0.00371368	0.00823199	MASS::glm.nb
Actinobacteria_Coriobacteriia_Coriobacteriales_Coriobacteriaceae	0.228809	0.000154846	0.00166582	0.117196	2.00981e-05	9.54661e-05	0.549955	0.00371368	0.00823199	MASS::glm.nb
Actinobacteria_Coriobacteriia_Coriobacteriales_Coriobacteriaceae_Atopobium	0.800093	0.390381	0.494483	0.604788	0.107339	0.169953	0.755748	0.0452662	0.0734195	log nlme::gls
Actinobacteria_Coriobacteriia_Coriobacteriales_Coriobacteriaceae_Collinsella	0.0958077	0.000962351	0.00606886	0.00255818	3.17231e-10	6.0274e-09	0.638101	0.231294	0.292973	MASS::glm.nb
Actinobacteria_Coriobacteriia_Coriobacteriales_Coriobacteriaceae_Eggerthella	0.801519	0.651846	0.710619	0.570127	0.380283	0.514962	0.81907	0.439725	0.512016	log nlme::gls
Actinobacteria_Coriobacteriia_Coriobacteriales_Coriobacteriaceae_uncultured	0.029459	0.000146591	0.00166582	0.0172455	0.001383	0.00497132	0.58141	0.228304	0.292973	MASS::glm.nb
Bacteroidetes	5.89385	8.6628e-06	0.00018287	0.0701222	2.99986e-07	2.65988e-06	1.15102	0.505327	0.546411	MASS::glm.nb
Bacteroidetes_Bacteroidia	5.89385	8.6628e-06	0.00018287	0.0701222	2.99986e-07	2.65988e-06	1.15102	0.505327	0.546411	MASS::glm.nb
Bacteroidetes_Bacteroidia_Bacteroidales	5.89385	8.6628e-06	0.00018287	0.0701222	2.99986e-07	2.65988e-06	1.15102	0.505327	0.546411	MASS::glm.nb
Bacteroidetes_Bacteroidia_Bacteroidales_Bacteroidaceae	6.51934	1.09997e-05	0.00018287	0.0621673	5.75345e-07	4.50123e-06	1.17922	0.465287	0.526196	MASS::glm.nb
Bacteroidetes_Bacteroidia_Bacteroidales_Bacteroidaceae_Bacteroides	6.51934	1.09997e-05	0.00018287	0.0621673	5.75345e-07	4.50123e-06	1.17922	0.465287	0.526196	MASS::glm.nb
Bacteroidetes_Bacteroidia_Bacteroidales_Porphyromonadaceae	1.63579	0.379854	0.490492	0.179638	0.0199388	0.0465239	0.587461	0.0739681	0.111793	MASS::glm.nb
Bacteroidetes_Bacteroidia_Bacteroidales_Porphyromonadaceae_Dysgonomonas	1.08466e-15	0.99999	0.99999	0.15888	0.117295	0.183533	0.445376	0.0660886	0.103409	MASS::glm.nb
Bacteroidetes_Bacteroidia_Bacteroidales_Porphyromonadaceae_Parabacteroides	3.11032	0.0920142	0.198046	0.189599	0.0612484	0.114943	0.585358	0.135007	0.181373	MASS::glm.nb
Bacteroidetes_Bacteroidia_Bacteroidales_Prevotellaceae	0.552534	0.305915	0.42382	0.116971	0.0212085	0.0486333	0.793752	0.44272	0.512016	MASS::glm.nb
Bacteroidetes_Bacteroidia_Bacteroidales_Prevotellaceae_Prevotella	0.560912	0.321859	0.428436	0.118574	0.0226946	0.051159	0.803633	0.47104	0.526196	MASS::glm.nb
Bacteroidetes_Bacteroidia_Bacteroidales_Rikenellaceae	2.46587	0.21956	0.331835	0.0384529	0.00493733	0.0148466	0.433612	0.0347734	0.0570971	MASS::glm.nb
Bacteroidetes_Bacteroidia_Bacteroidales_Rikenellaceae_Alistipes	2.46587	0.21956	0.331835	0.0384529	0.00493733	0.0148466	0.433612	0.0347734	0.0570971	MASS::glm.nb
Firmicutes	0.919635	0.678788	0.721229	0.627476	0.0563857	0.11193	0.671964	0.000163558	0.000517935	log nlme::gls
Firmicutes_Bacilli	1.52738	0.02137	0.0710551	1.09753	0.71981	0.797789	1.39506	0.00154615	0.00380812	log nlme::gls
Firmicutes_Bacilli_Bacillales	0.938121	0.81149	0.836652	0.596231	0.142799	0.220841	0.663524	0.00422848	0.00921947	log nlme::gls
Firmicutes_Bacilli_Bacillales_Bacillaceae	0.870718	0.566124	0.666323	0.681459	0.198611	0.296801	0.67776	0.00216197	0.00504459	log nlme::gls
Firmicutes_Bacilli_Bacillales_Bacillaceae_Bacillus	0.870718	0.566124	0.666323	0.681459	0.198611	0.296801	0.67776	0.00216197	0.00504459	log nlme::gls
Firmicutes_Bacilli_Bacillales_FamilyXIIncertaeSedis	0.616045	0.205505	0.331835	0.735876	0.531578	0.636935	0.867363	0.474763	0.526196	MASS::glm.nb
Firmicutes_Bacilli_Bacillales_FamilyXIIncertaeSedis_Gemella	0.616045	0.205505	0.331835	0.735876	0.531578	0.636935	0.867363	0.474763	0.526196	MASS::glm.nb
Firmicutes_Bacilli_Bacillales_Staphylococcaceae	0.679297	0.215531	0.331835	0.353288	0.0105911	0.0270887	0.666182	0.0138594	0.0271074	MASS::glm.nb
Firmicutes_Bacilli_Bacillales_Staphylococcaceae_Staphylococcus	0.679297	0.215531	0.331835	0.353288	0.0105911	0.0270887	0.666182	0.0138594	0.0271074	MASS::glm.nb
Firmicutes_Bacilli_Lactobacillales	1.56112	0.0158909	0.0623902	1.12395	0.65445	0.75036	1.4241	0.000889641	0.00241474	log nlme::gls
Firmicutes_Bacilli_Lactobacillales_Carnobacteriaceae	0.334344	0.0621349	0.153036	1.85984	0.383318	0.514962	1.32308	0.343799	0.423382	MASS::glm.nb
Firmicutes_Bacilli_Lactobacillales_Carnobacteriaceae_Granulicatella	0.334344	0.0621349	0.153036	1.85984	0.383318	0.514962	1.32308	0.343799	0.423382	MASS::glm.nb
Firmicutes_Bacilli_Lactobacillales_Enterococcaceae	2.32417	0.01761	0.0633007	0.687073	0.412687	0.538111	0.426751	6.02425e-06	2.35655e-05	MASS::glm.nb
Firmicutes_Bacilli_Lactobacillales_Enterococcaceae_Enterococcus	2.32417	0.01761	0.0633007	0.687073	0.412687	0.538111	0.426751	6.02425e-06	2.35655e-05	MASS::glm.nb
Firmicutes_Bacilli_Lactobacillales_Lactobacillaceae	1.31653	0.602941	0.691303	14.2077	9.75789e-10	1.2978e-08	11.521	3.66507e-22	2.47085e-20	log nlme::gls
Firmicutes_Bacilli_Lactobacillales_Lactobacillaceae_Lactobacillus	1.2928	0.629352	0.691768	14.2991	8.82168e-10	1.2978e-08	11.5753	3.71557e-22	2.47085e-20	log nlme::gls
Firmicutes_Bacilli_Lactobacillales_Streptococcaceae	1.23735	0.429625	0.524222	0.359314	0.0242879	0.05309	0.988808	0.939609	0.939609	log nlme::gls
Firmicutes_Bacilli_Lactobacillales_Streptococcaceae_Streptococcus	1.23814	0.428086	0.524222	0.359522	0.0243495	0.05309	0.987266	0.931256	0.938311	log nlme::gls
Firmicutes_Clostridia	0.636896	0.267936	0.387342	0.186386	0.0030646	0.00994128	0.21237	9.33452e-12	1.77356e-10	log nlme::gls
Firmicutes_Clostridia_Clostridiales	0.636896	0.267936	0.387342	0.186386	0.0030646	0.00994128	0.21237	9.33452e-12	1.77356e-10	log nlme::gls
Firmicutes_Clostridia_Clostridiales_Christensenellaceae	0.567661	0.0193958	0.0661445	0.44404	0.00502328	0.0148466	0.696567	0.0109642	0.022785	log nlme::gls
Firmicutes_Clostridia_Clostridiales_Christensenellaceae_uncultured	0.567661	0.0193958	0.0661445	0.44404	0.00502328	0.0148466	0.696567	0.0109642	0.022785	log nlme::gls
Firmicutes_Clostridia_Clostridiales_Clostridiaceae	1.19825	0.675373	0.721229	0.237169	0.0098227	0.0261284	0.270065	1.03928e-08	9.21496e-08	MASS::glm.nb
Firmicutes_Clostridia_Clostridiales_Clostridiaceae_Clostridium	1.19825	0.675373	0.721229	0.237169	0.0098227	0.0261284	0.270065	1.03928e-08	9.21496e-08	MASS::glm.nb
Firmicutes_Clostridia_Clostridiales_FamilyXIIncertaeSedis	0.2091	0.000680726	0.00532568	0.127483	0.000669549	0.00278281	0.68377	0.112064	0.153655	MASS::glm.nb
Firmicutes_Clostridia_Clostridiales_FamilyXIIncertaeSedis_Anaerococcus	0.587682	0.415556	0.516532	0.168964	0.0453353	0.0942125	1.16578	0.65415	0.690492	MASS::glm.nb
Firmicutes_Clostridia_Clostridiales_FamilyXIIncertaeSedis_Finegoldia	0.108678	0.000162824	0.00166582	0.231101	0.0425246	0.0897741	0.325203	8.62643e-05	0.000286829	MASS::glm.nb
Firmicutes_Clostridia_Clostridiales_FamilyXIIncertaeSedis_Peptoniphilus	0.160168	0.00521218	0.0277288	0.045521	0.000958137	0.00364092	0.708552	0.303762	0.381136	MASS::glm.nb
Firmicutes_Clostridia_Clostridiales_Lachnospiraceae	0.489601	0.162503	0.280687	0.100282	0.000731269	0.00294724	0.173194	2.82531e-10	4.15284e-09	log nlme::gls
Firmicutes_Clostridia_Clostridiales_Lachnospiraceae_Anaerostipes	0.182132	0.00248381	0.0137644	1.11299	0.880285	0.929189	0.401666	0.00188256	0.00455238	MASS::glm.nb
Firmicutes_Clostridia_Clostridiales_Lachnospiraceae_Blautia	1.19911	0.712877	0.746556	0.455905	0.216972	0.315268	0.412329	0.000691951	0.00191728	MASS::glm.nb
Firmicutes_Clostridia_Clostridiales_Lachnospiraceae_Coprococcus	0.420864	0.00100387	0.00606886	0.302332	0.000173491	0.000744333	0.591009	0.000617	0.00174598	log nlme::gls
Firmicutes_Clostridia_Clostridiales_Lachnospiraceae_Dorea	2.6838	0.112932	0.211549	0.523047	0.421168	0.543838	0.608183	0.132505	0.179828	MASS::glm.nb
Firmicutes_Clostridia_Clostridiales_Lachnospiraceae_IncertaeSedis	0.400882	0.0828683	0.186805	0.132925	0.00154556	0.00527077	0.151319	2.95712e-11	4.91622e-10	log nlme::gls
Firmicutes_Clostridia_Clostridiales_Lachnospiraceae_Pseudobutyrivibrio	0.626803	0.0923221	0.198046	0.293532	0.000822939	0.00321914	0.467343	3.13364e-07	1.60298e-06	log nlme::gls
Firmicutes_Clostridia_Clostridiales_Lachnospiraceae_Roseburia	0.487953	0.183535	0.312951	0.0124005	9.45633e-09	1.04808e-07	0.612999	0.0861731	0.121926	MASS::glm.nb
Firmicutes_Clostridia_Clostridiales_Peptostreptococcaceae	0.323716	0.00956545	0.0434346	0.461398	0.156186	0.238767	0.582237	0.0131081	0.0264148	log nlme::gls
Firmicutes_Clostridia_Clostridiales_Peptostreptococcaceae_IncertaeSedis	0.352845	0.0145685	0.0623902	0.510902	0.211684	0.312821	0.591939	0.0159721	0.0307868	log nlme::gls
Firmicutes_Clostridia_Clostridiales_Peptostreptococcaceae_Peptostreptococcus	0.287729	0.265717	0.387342	9.98949e-15	0.999978	0.999997	1.35285	0.596427	0.634598	MASS::glm.nb
Firmicutes_Clostridia_Clostridiales_Ruminococcaceae	0.658049	0.288668	0.404135	0.178829	0.0012702	0.0046927	0.348391	7.27361e-07	3.45496e-06	log nlme::gls
Firmicutes_Clostridia_Clostridiales_Ruminococcaceae_Faecalibacterium	0.449411	0.00174608	0.0100969	0.301832	0.000147593	0.000654327	0.519248	4.0151e-06	1.66878e-05	log nlme::gls
Firmicutes_Clostridia_Clostridiales_Ruminococcaceae_Flavonifractor	2.24182	0.317983	0.428436	2.13957	0.46509	0.589114	0.70528	0.416048	0.498508	MASS::glm.nb
Firmicutes_Clostridia_Clostridiales_Ruminococcaceae_IncertaeSedis	0.415203	0.000449201	0.00373398	0.262403	4.79069e-06	3.18581e-05	0.459203	1.00303e-07	6.67014e-07	log nlme::gls
Firmicutes_Clostridia_Clostridiales_Ruminococcaceae_Ruminococcus	0.6073	0.0164185	0.0623902	0.4415	0.00146722	0.00513528	0.690671	0.00120964	0.00321765	log nlme::gls
Firmicutes_Clostridia_Clostridiales_Ruminococcaceae_Subdoligranulum	1.34689	0.608486	0.691698	0.0193207	9.30332e-07	6.87412e-06	0.769128	0.394102	0.476505	MASS::glm.nb
Firmicutes_Erysipelotrichia	0.166092	0.000804783	0.00535181	0.00101588	1.47742e-14	6.54989e-13	0.169805	3.74693e-10	4.15284e-09	MASS::glm.nb
Firmicutes_Erysipelotrichia_Erysipelotrichales	0.166092	0.000804783	0.00535181	0.00101588	1.47742e-14	6.54989e-13	0.169805	3.74693e-10	4.15284e-09	MASS::glm.nb
Firmicutes_Erysipelotrichia_Erysipelotrichales_Erysipelotrichaceae	0.166092	0.000804783	0.00535181	0.00101588	1.47742e-14	6.54989e-13	0.169805	3.74693e-10	4.15284e-09	MASS::glm.nb
Firmicutes_Erysipelotrichia_Erysipelotrichales_Erysipelotrichaceae_IncertaeSedis	0.335559	0.0916521	0.198046	0.00868169	4.71245e-06	3.18581e-05	0.236552	2.49061e-05	9.20141e-05	MASS::glm.nb
Firmicutes_Erysipelotrichia_Erysipelotrichales_Erysipelotrichaceae_uncultured	0.175098	0.00695212	0.0342456	0.000386875	5.64867e-09	6.82976e-08	0.165314	1.33775e-07	8.08729e-07	MASS::glm.nb
Firmicutes_Negativicutes	0.59828	0.123007	0.224109	0.847956	0.700815	0.783264	0.731932	0.0764804	0.113021	MASS::glm.nb
Firmicutes_Negativicutes_Selenomonadales	0.59828	0.123007	0.224109	0.847956	0.700815	0.783264	0.731932	0.0764804	0.113021	MASS::glm.nb
Firmicutes_Negativicutes_Selenomonadales_Acidaminococcaceae	0.266844	0.128104	0.230241	0.10853	0.0623697	0.115211	0.702004	0.426078	0.502461	MASS::glm.nb
Firmicutes_Negativicutes_Selenomonadales_Acidaminococcaceae_Phascolarctobacterium	0.0215361	0.000192533	0.00182906	0.0966839	0.0547178	0.110265	0.698828	0.426903	0.502461	MASS::glm.nb
Firmicutes_Negativicutes_Selenomonadales_Veillonellaceae	0.610138	0.142997	0.250244	0.868677	0.746045	0.820033	0.7416	0.0938007	0.131321	MASS::glm.nb
Firmicutes_Negativicutes_Selenomonadales_Veillonellaceae_Dialister	0.360428	0.130814	0.231976	9.6406e-13	0.999777	0.999997	2.1594	0.0239199	0.045117	MASS::glm.nb
Firmicutes_Negativicutes_Selenomonadales_Veillonellaceae_Megasphaera	0.0285511	0.000295356	0.00261882	0.0531043	0.0186251	0.0442345	0.149382	0.000153852	0.00049908	MASS::glm.nb
Firmicutes_Negativicutes_Selenomonadales_Veillonellaceae_Veillonella	0.646262	0.203725	0.331835	0.929135	0.868116	0.923675	0.741418	0.0995657	0.13794	MASS::glm.nb
Proteobacteria	1.79157	0.0364108	0.107614	0.783792	0.497696	0.624468	0.457727	1.14973e-07	7.28162e-07	MASS::glm.nb
Proteobacteria_Betaproteobacteria	0.78176	0.387057	0.494483	0.730286	0.391281	0.520404	0.811427	0.165766	0.220469	log nlme::gls
Proteobacteria_Betaproteobacteria_Burkholderiales	0.793715	0.407954	0.511867	0.789897	0.512239	0.630813	0.837511	0.229618	0.292973	log nlme::gls
Proteobacteria_Betaproteobacteria_Burkholderiales_Alcaligenaceae	0.667415	0.0826469	0.186805	0.738653	0.321506	0.445419	0.776827	0.0606842	0.0960834	log nlme::gls
Proteobacteria_Betaproteobacteria_Burkholderiales_Alcaligenaceae_Bordetella	0.644323	0.027933	0.0892917	0.839016	0.528854	0.636935	0.749516	0.0130493	0.0264148	log nlme::gls
Proteobacteria_Betaproteobacteria_Burkholderiales_Burkholderiaceae	1.08303	0.722169	0.750379	1.06036	0.83949	0.907742	1.24197	0.0700648	0.107111	log nlme::gls
Proteobacteria_Betaproteobacteria_Burkholderiales_Burkholderiaceae_Burkholderia	1.0214	0.923596	0.937697	1.07724	0.795331	0.867041	1.23908	0.070051	0.107111	log nlme::gls
Proteobacteria_Betaproteobacteria_Burkholderiales_Oxalobacteraceae	0.830828	0.27789	0.393184	0.772686	0.220451	0.315268	0.88139	0.189394	0.246955	log nlme::gls
Proteobacteria_Betaproteobacteria_Burkholderiales_Oxalobacteraceae_Oxalobacter	0.830828	0.27789	0.393184	0.772686	0.220451	0.315268	0.88139	0.189394	0.246955	log nlme::gls
Proteobacteria_Betaproteobacteria_Neisseriales	1.4101	0.627016	0.691768	0.0794903	0.0704098	0.120058	0.503932	0.0821409	0.11747	MASS::glm.nb
Proteobacteria_Betaproteobacteria_Neisseriales_Neisseriaceae	1.4101	0.627016	0.691768	0.0794903	0.0704098	0.120058	0.503932	0.0821409	0.11747	MASS::glm.nb
Proteobacteria_Betaproteobacteria_Neisseriales_Neisseriaceae_Neisseria	1.4101	0.627016	0.691768	0.0794903	0.0704098	0.120058	0.503932	0.0821409	0.11747	MASS::glm.nb
Proteobacteria_Deltaproteobacteria	1.74396	0.210821	0.331835	0.339241	0.0741908	0.12182	0.404609	0.000189333	0.000559584	MASS::glm.nb
Proteobacteria_Deltaproteobacteria_Desulfovibrionales	1.74396	0.210821	0.331835	0.339241	0.0741908	0.12182	0.404609	0.000189333	0.000559584	MASS::glm.nb
Proteobacteria_Deltaproteobacteria_Desulfovibrionales_Desulfovibrionaceae	1.74396	0.210821	0.331835	0.339241	0.0741908	0.12182	0.404609	0.000189333	0.000559584	MASS::glm.nb
Proteobacteria_Deltaproteobacteria_Desulfovibrionales_Desulfovibrionaceae_Bilophila	0.0626838	0.00663958	0.033964	1.21998e-15	0.99999	0.999997	0.34095	0.024085	0.045117	MASS::glm.nb
Proteobacteria_Deltaproteobacteria_Desulfovibrionales_Desulfovibrionaceae_Desulfovibrio	3.52629	0.00805504	0.0382615	0.889671	0.854936	0.916988	0.607043	0.0604906	0.0960834	MASS::glm.nb
Proteobacteria_Gammaproteobacteria	1.80061	0.0381066	0.110178	0.786765	0.511836	0.630813	0.456116	1.67001e-07	9.65702e-07	MASS::glm.nb
Proteobacteria_Gammaproteobacteria_Aeromonadales	0.259892	0.0463984	0.121	2.10188e-16	0.999997	0.999997	0.232766	3.73005e-05	0.000127204	MASS::glm.nb
Proteobacteria_Gammaproteobacteria_Aeromonadales_Aeromonadaceae	0.259892	0.0463984	0.121	2.10188e-16	0.999997	0.999997	0.232766	3.73005e-05	0.000127204	MASS::glm.nb
Proteobacteria_Gammaproteobacteria_Aeromonadales_Aeromonadaceae_Aeromonas	0.259892	0.0463984	0.121	2.10188e-16	0.999997	0.999997	0.232766	3.73005e-05	0.000127204	MASS::glm.nb
Proteobacteria_Gammaproteobacteria_Enterobacteriales	1.87717	0.0406603	0.112663	0.827105	0.632195	0.732936	0.466548	2.8e-06	1.20129e-05	MASS::glm.nb
Proteobacteria_Gammaproteobacteria_Enterobacteriales_Enterobacteriaceae	1.87717	0.0406603	0.112663	0.827105	0.632195	0.732936	0.466548	2.8e-06	1.20129e-05	MASS::glm.nb
Proteobacteria_Gammaproteobacteria_Enterobacteriales_Enterobacteriaceae_Citrobacter	1.16863	0.861546	0.881428	1.94847	0.562209	0.667624	0.652999	0.367863	0.44886	MASS::glm.nb
Proteobacteria_Gammaproteobacteria_Enterobacteriales_Enterobacteriaceae_Enterobacter	1.3311	0.490069	0.592537	0.675202	0.462213	0.589114	0.462927	0.000443887	0.00128341	MASS::glm.nb
Proteobacteria_Gammaproteobacteria_Enterobacteriales_Enterobacteriaceae_Escherichia.Shigella	2.00451	0.107209	0.209953	0.805956	0.69827	0.783264	0.548836	0.00859847	0.0184451	MASS::glm.nb
Proteobacteria_Gammaproteobacteria_Enterobacteriales_Enterobacteriaceae_Klebsiella	1.39734	0.561502	0.666323	1.1022	0.895772	0.938092	0.223369	8.93527e-07	4.0979e-06	MASS::glm.nb
Proteobacteria_Gammaproteobacteria_Enterobacteriales_Enterobacteriaceae_Salmonella	0.964361	0.97501	0.982397	0.48682	0.633742	0.732936	1.39103	0.590123	0.632955	MASS::glm.nb
Proteobacteria_Gammaproteobacteria_Pasteurellales	0.630724	0.325353	0.428436	0.207054	0.00963562	0.0261284	0.138378	2.44778e-15	6.5111e-14	MASS::glm.nb
Proteobacteria_Gammaproteobacteria_Pasteurellales_Pasteurellaceae	0.630724	0.325353	0.428436	0.207054	0.00963562	0.0261284	0.138378	2.44778e-15	6.5111e-14	MASS::glm.nb
Proteobacteria_Gammaproteobacteria_Pasteurellales_Pasteurellaceae_Haemophilus	0.630724	0.325353	0.428436	0.207054	0.00963562	0.0261284	0.138378	2.44778e-15	6.5111e-14	MASS::glm.nb
Proteobacteria_Gammaproteobacteria_Pseudomonadales	0.524855	0.0783233	0.182754	0.326432	0.016828	0.0406932	0.533182	0.00128973	0.00323649	log nlme::gls
Proteobacteria_Gammaproteobacteria_Pseudomonadales_Pseudomonadaceae	0.524855	0.0783233	0.182754	0.326432	0.016828	0.0406932	0.533182	0.00128973	0.00323649	log nlme::gls
Proteobacteria_Gammaproteobacteria_Pseudomonadales_Pseudomonadaceae_Pseudomonas	0.524855	0.0783233	0.182754	0.326432	0.016828	0.0406932	0.533182	0.00128973	0.00323649	log nlme::gls
Verrucomicrobia	0.240921	0.107506	0.209953	0.00224447	9.89478e-06	5.26402e-05	1.15565	0.756407	0.767955	MASS::glm.nb
Verrucomicrobia_Verrucomicrobiae	0.240921	0.107506	0.209953	0.00224447	9.89478e-06	5.26402e-05	1.15565	0.756407	0.767955	MASS::glm.nb
Verrucomicrobia_Verrucomicrobiae_Verrucomicrobiales	0.240921	0.107506	0.209953	0.00224447	9.89478e-06	5.26402e-05	1.15565	0.756407	0.767955	MASS::glm.nb
Verrucomicrobia_Verrucomicrobiae_Verrucomicrobiales_Verrucomicrobiaceae	0.240921	0.107506	0.209953	0.00224447	9.89478e-06	5.26402e-05	1.15565	0.756407	0.767955	MASS::glm.nb
Verrucomicrobia_Verrucomicrobiae_Verrucomicrobiales_Verrucomicrobiaceae_Akkermansia	0.240921	0.107506	0.209953	0.00224447	9.89478e-06	5.26402e-05	1.15565	0.756407	0.767955	MASS::glm.nb
